# Supplementary material for: Identification of a Common Pharmacophore for Binding to MMP2 and RGD Integrin: Towards a Multitarget Approach to Inhibit Cancer Angiogenesis and Metastasis
Source: MDPI journal article supplement (doi:10.3390/molecules27041249), 2022-02-12

*Supplementary Materials*

# Identification of a common pharmacophore for binding to MMP2 and RGD integrin: towards a multitarget approach to inhibit cancer angiogenesis and metastasis

Lorenzo Baldini <sup>1</sup>, Elena Lenci <sup>1</sup>, Francesca Bianchini <sup>2</sup> and Andrea Trabocchi <sup>1,\*</sup>

<sup>1</sup> Department of Chemistry ‘Ugo Schiff’, University of Florence, I-50019 Sesto Fiorentino, Italy

<sup>2</sup> Department of Biomedical, Experimental and Clinical Sciences ‘Mario Serio’, University of Florence, I-50134 Florence, Italy

\* Correspondence: andrea.trabocchi@unifi.it

Copies of <sup>1</sup>H and <sup>13</sup>C-NMR spectra of compounds 3–21

S2–S20

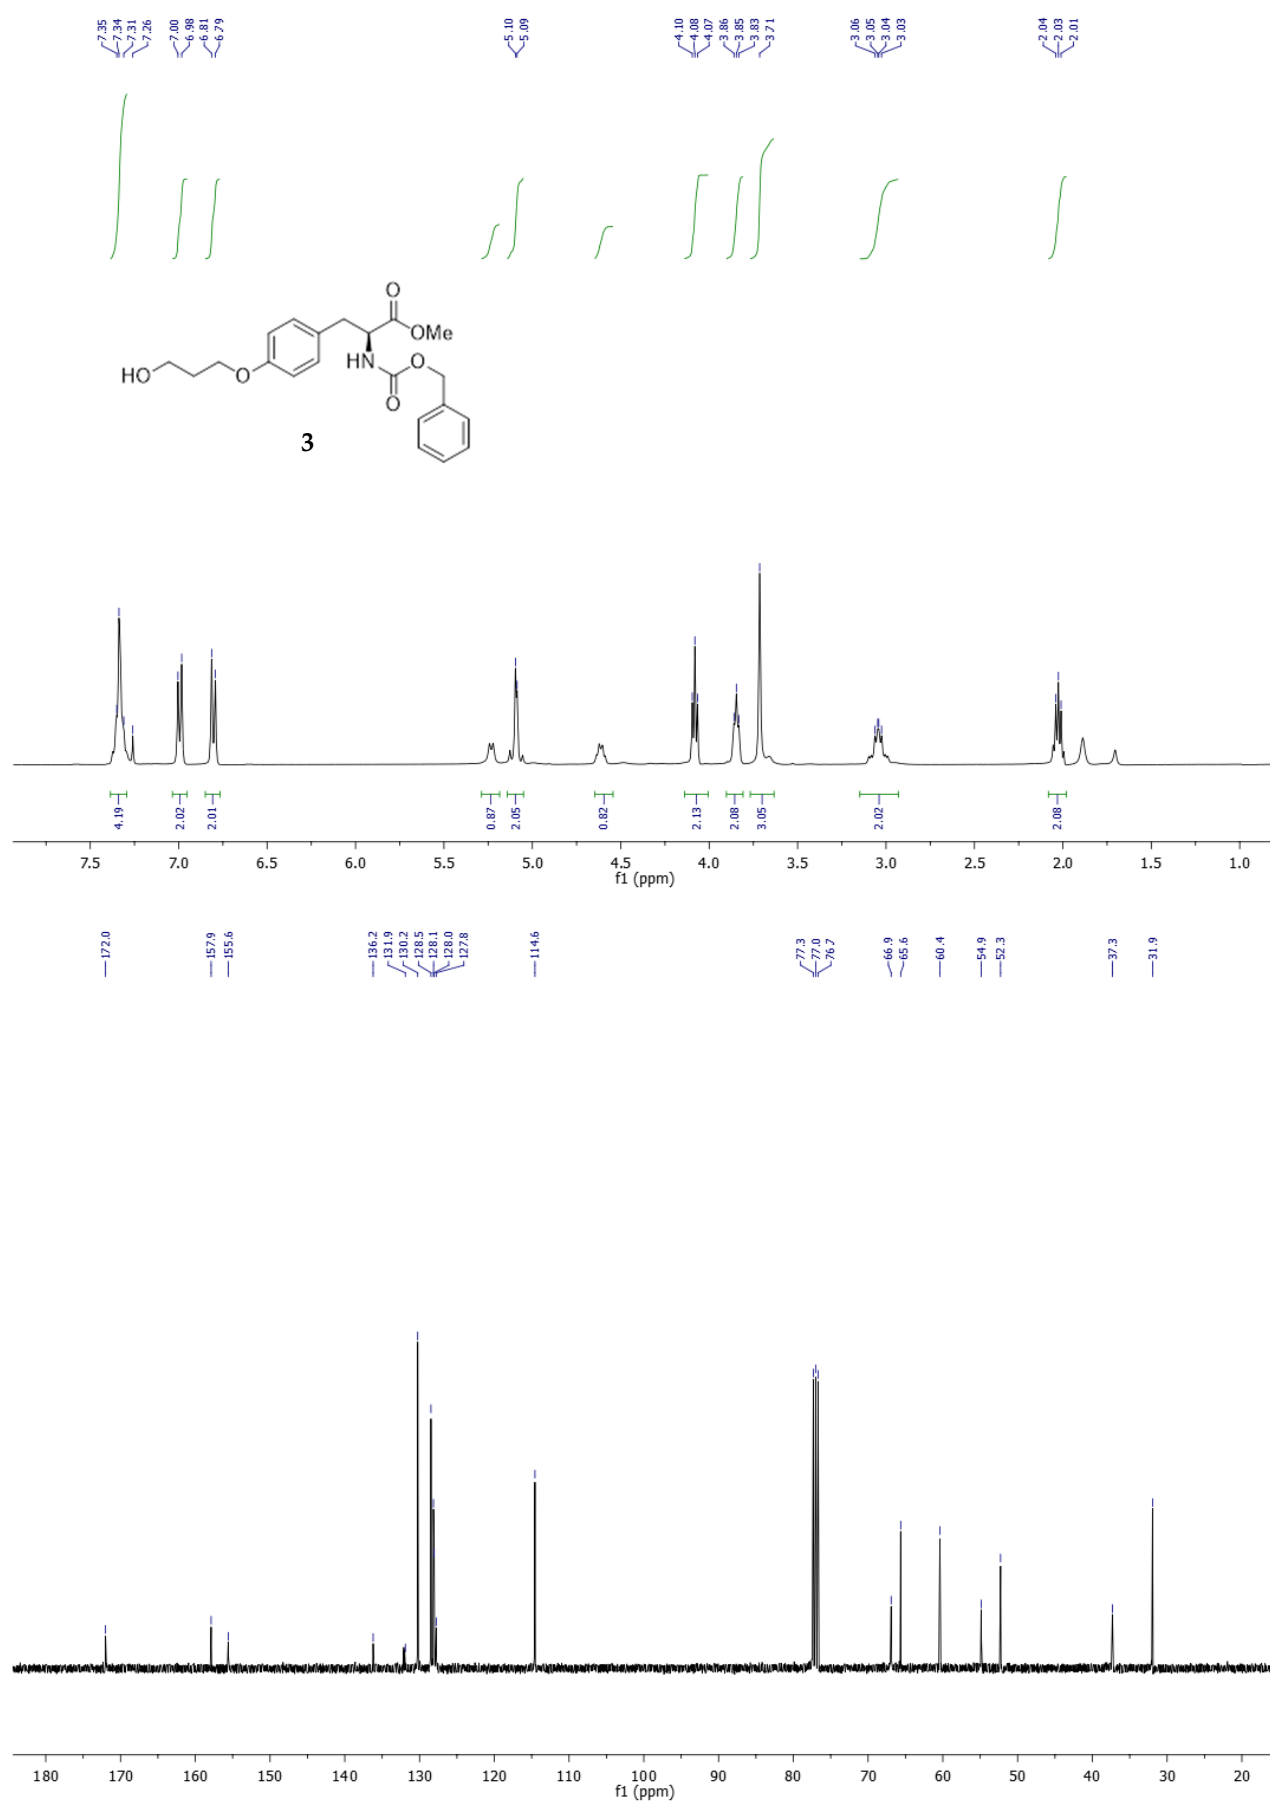

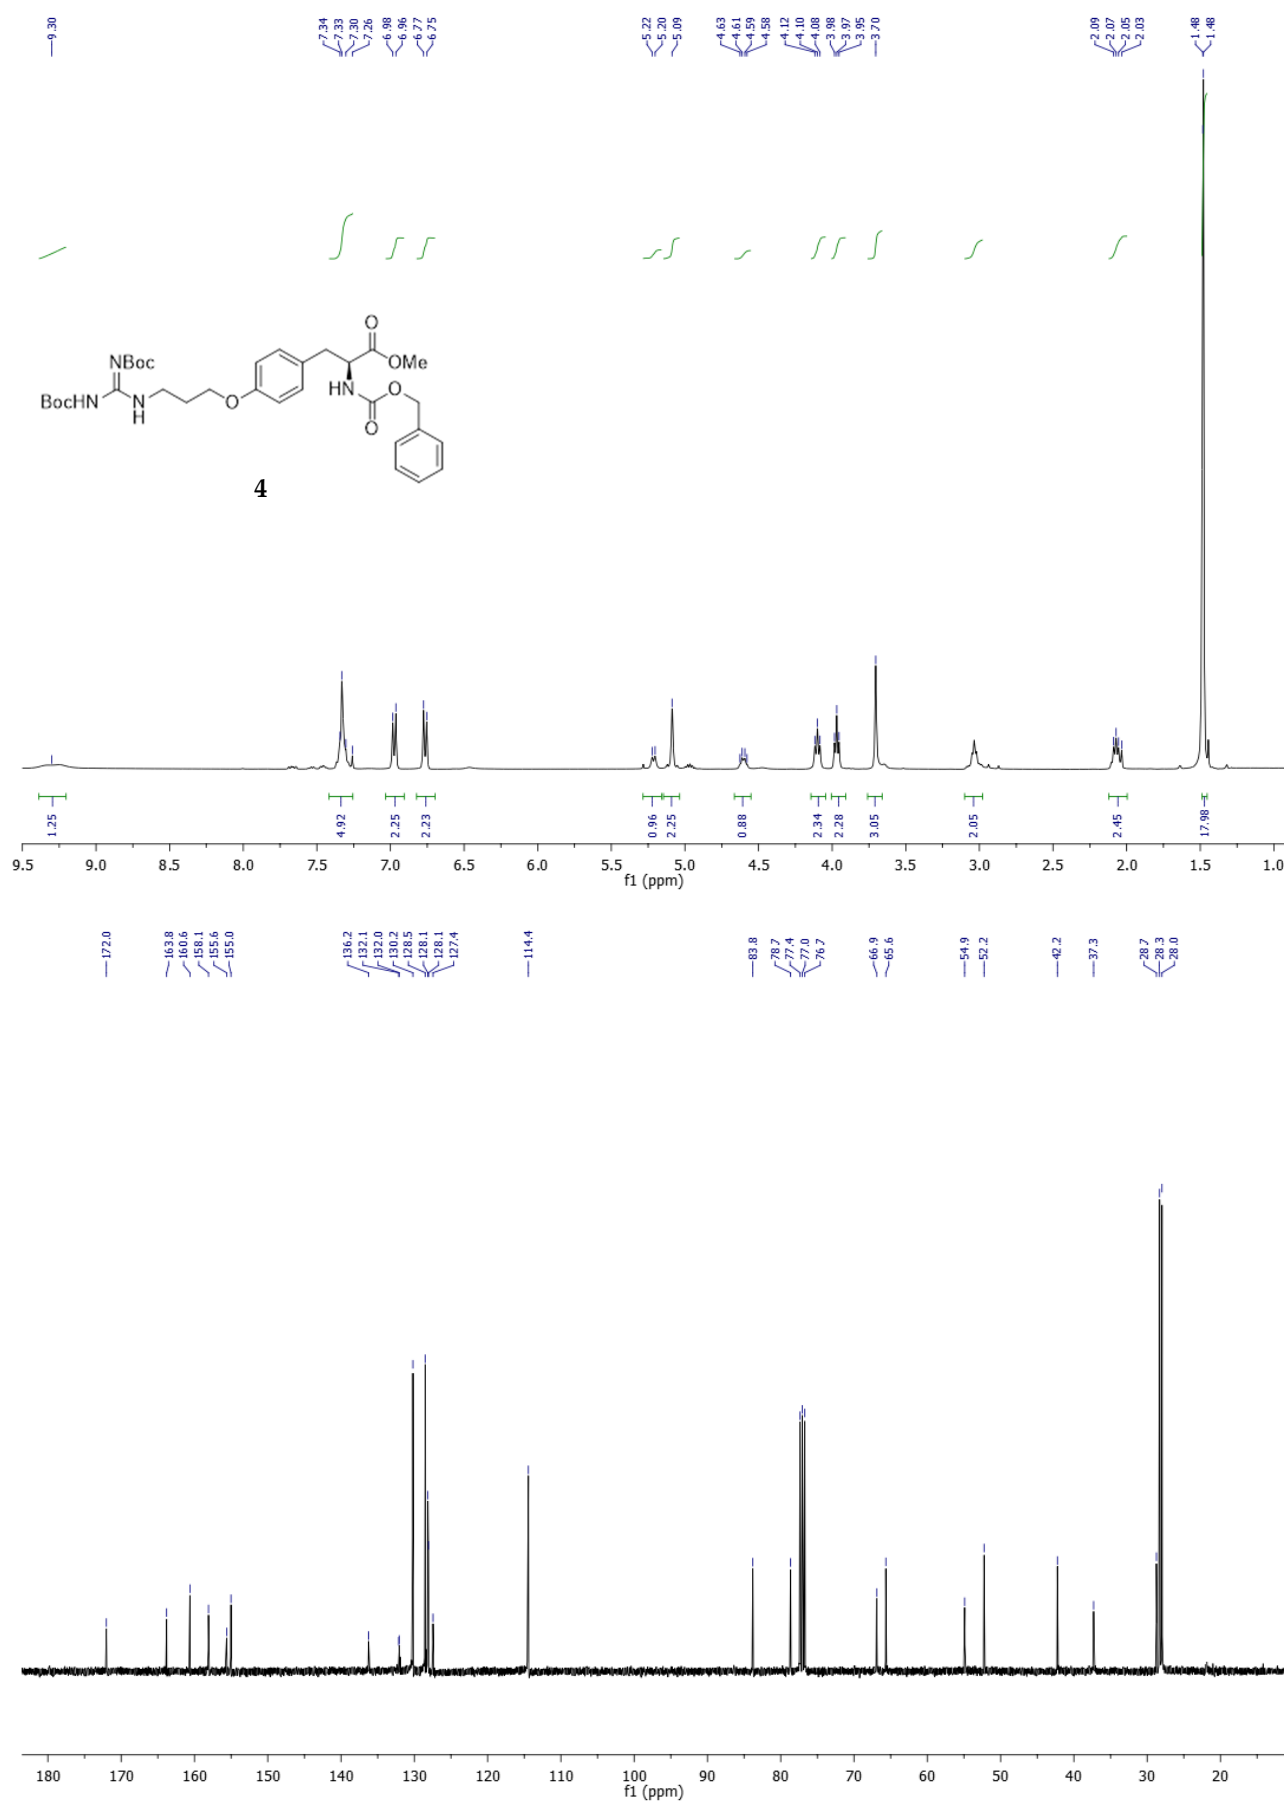

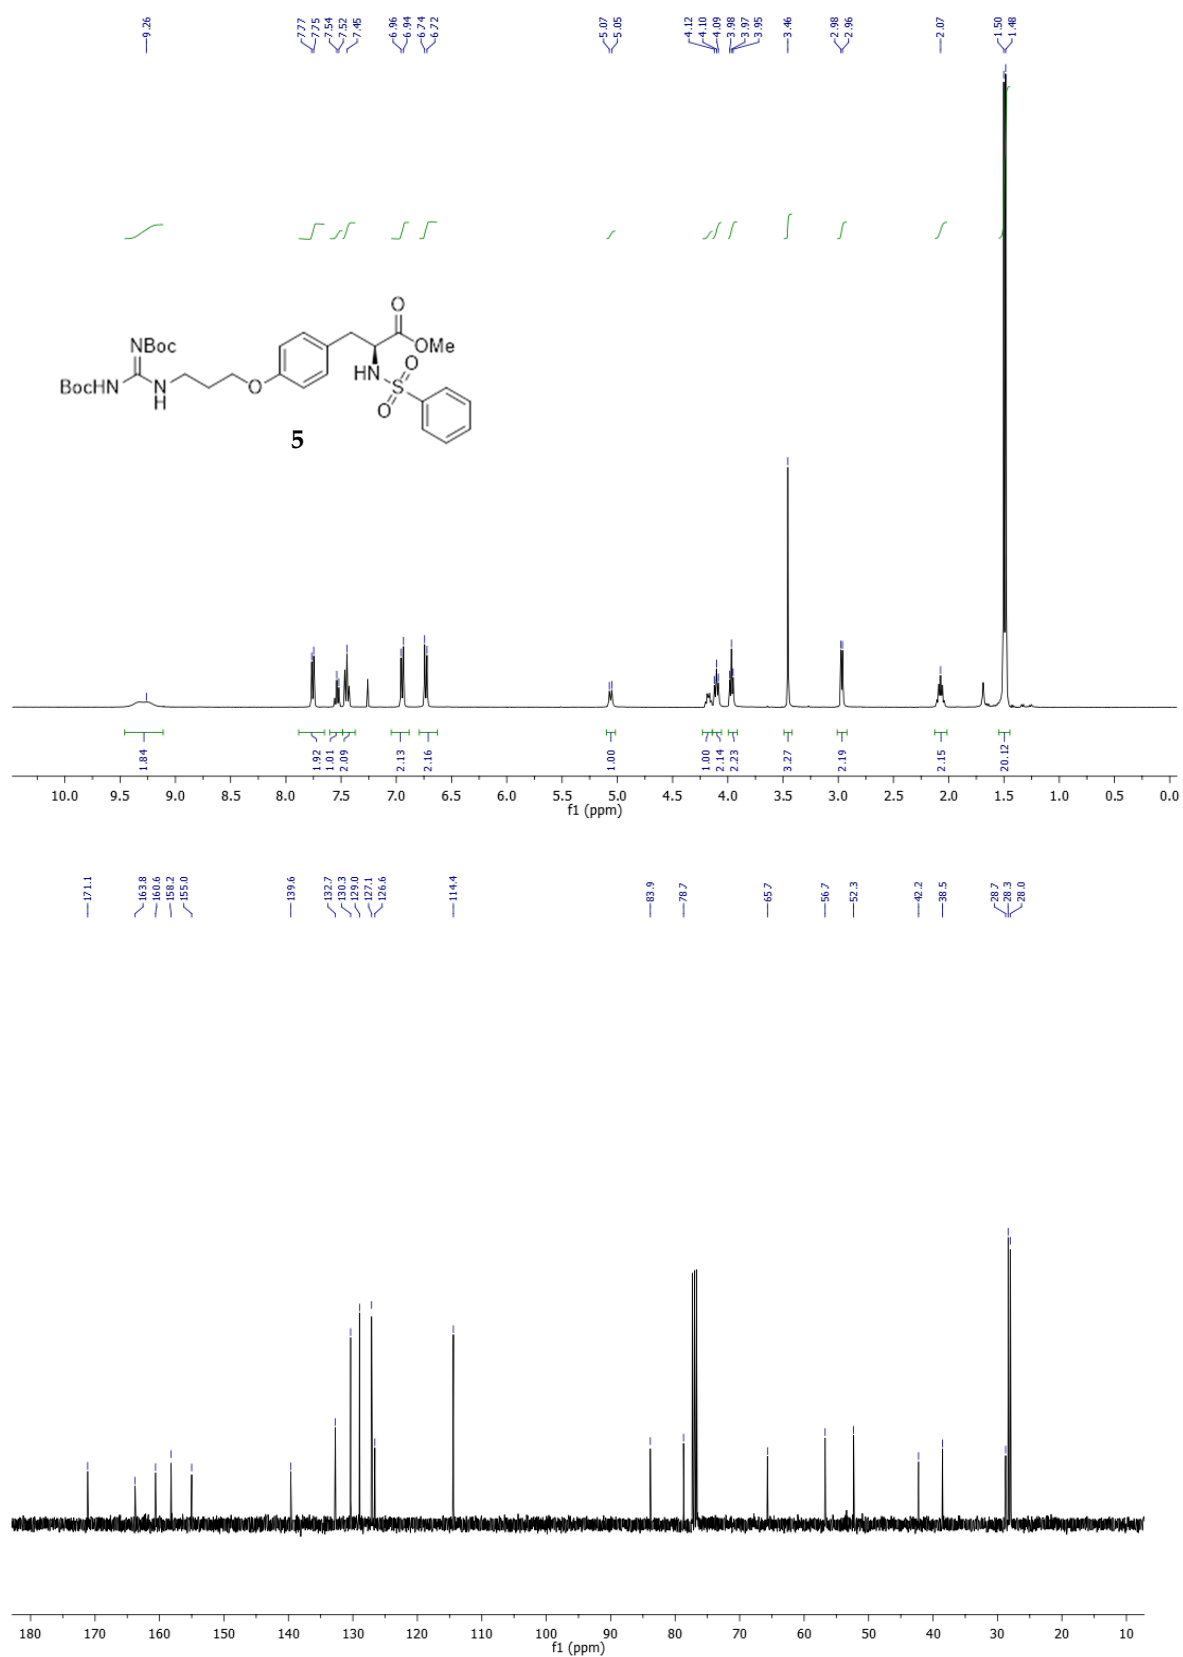

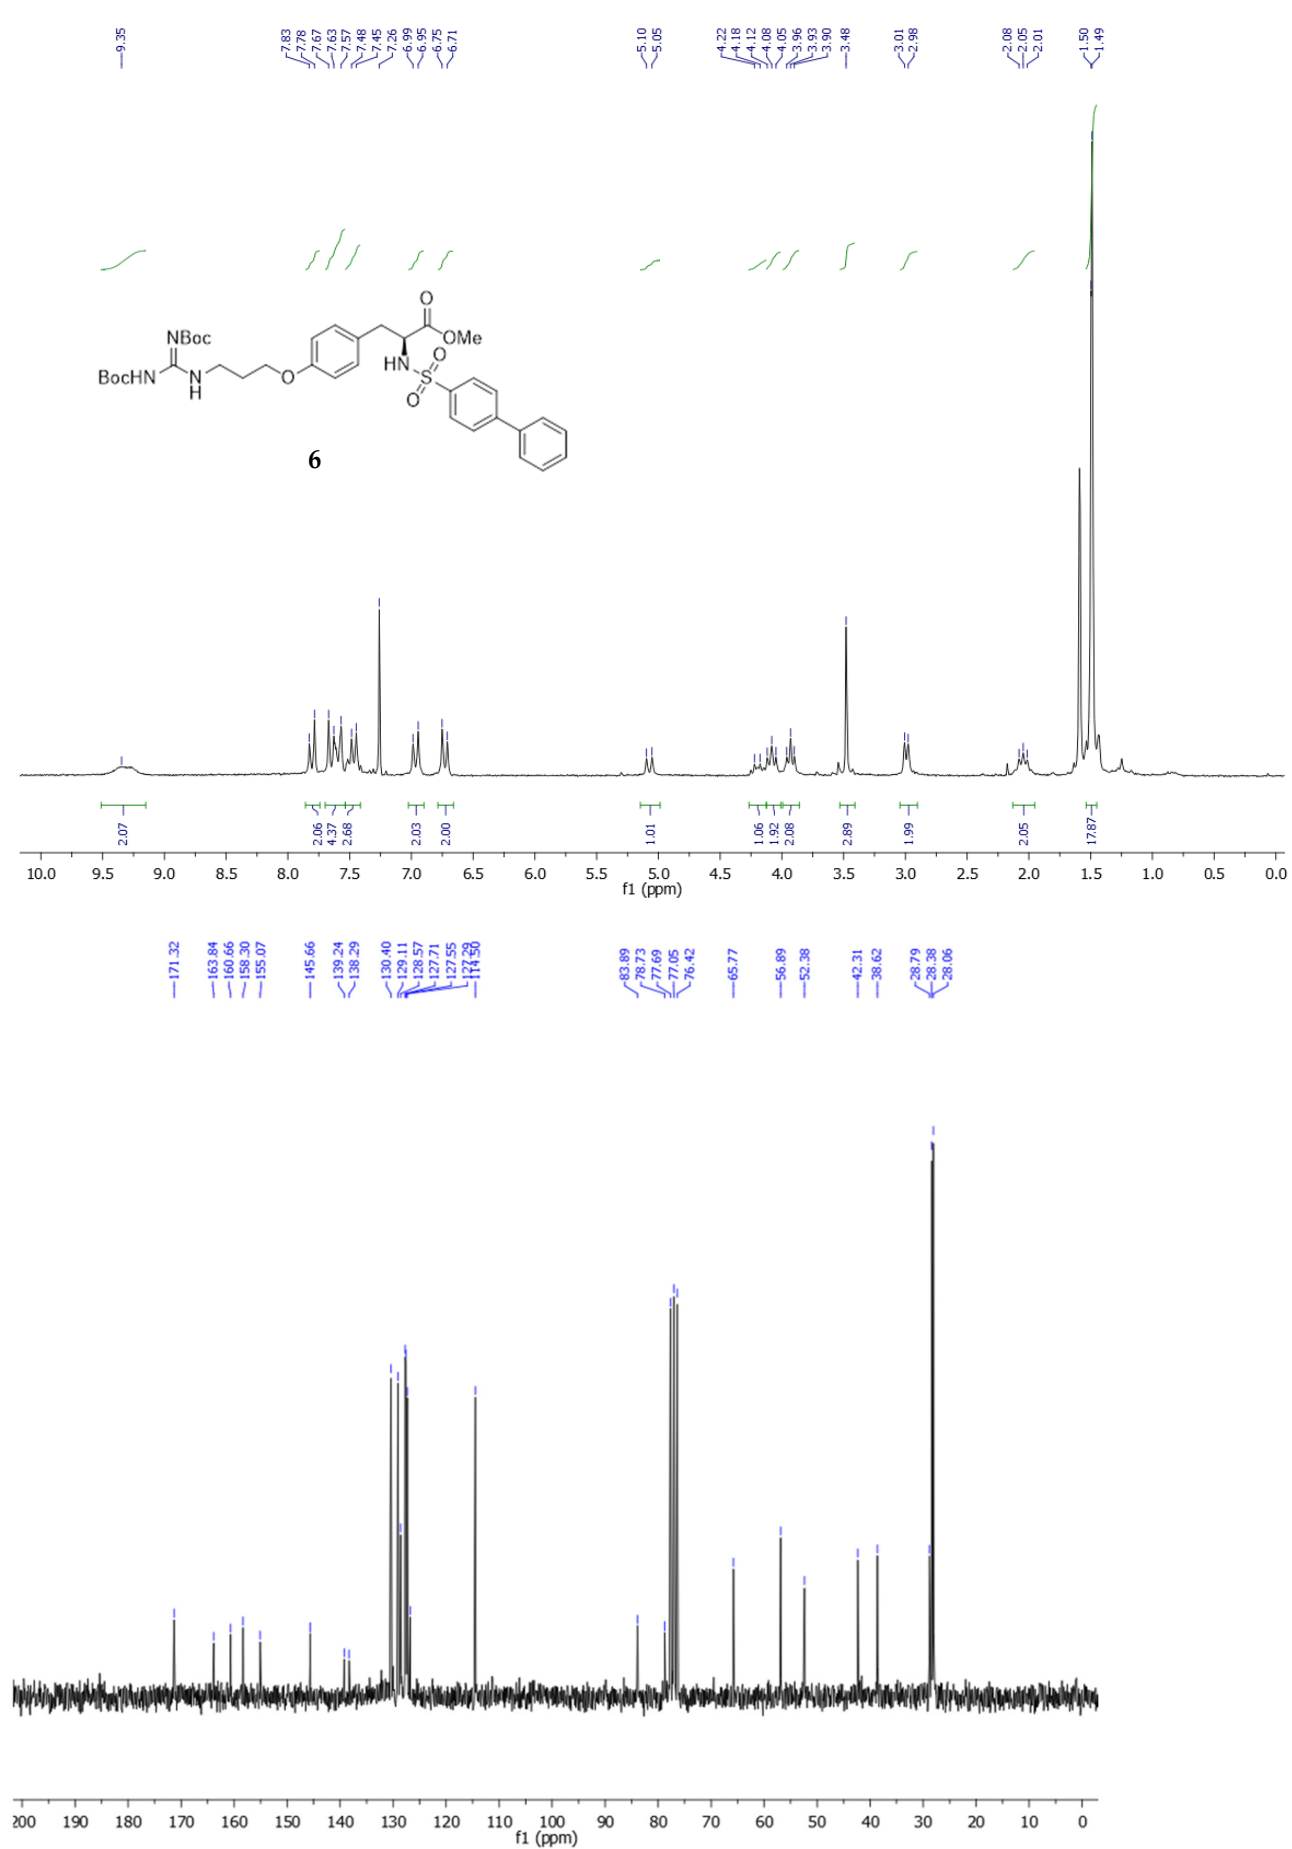

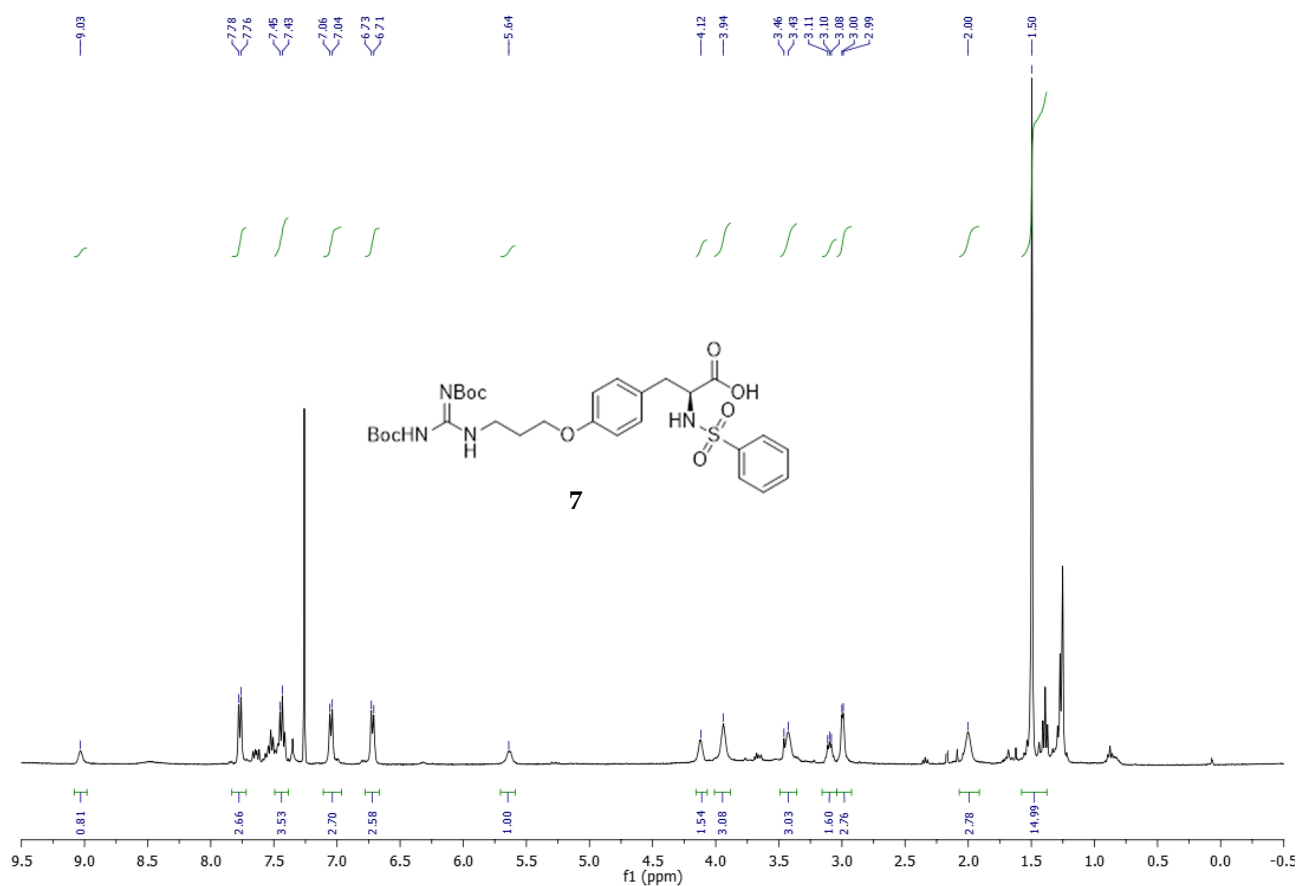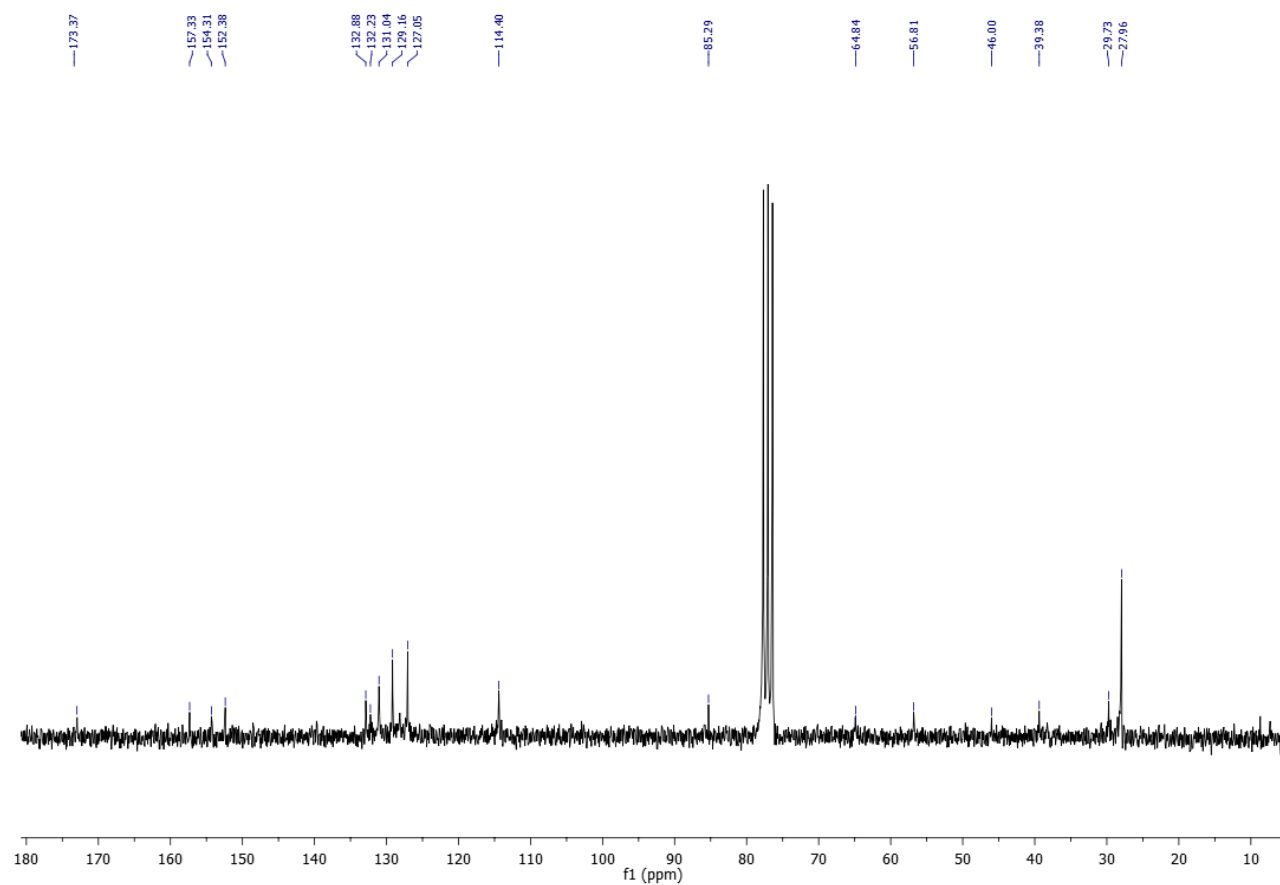

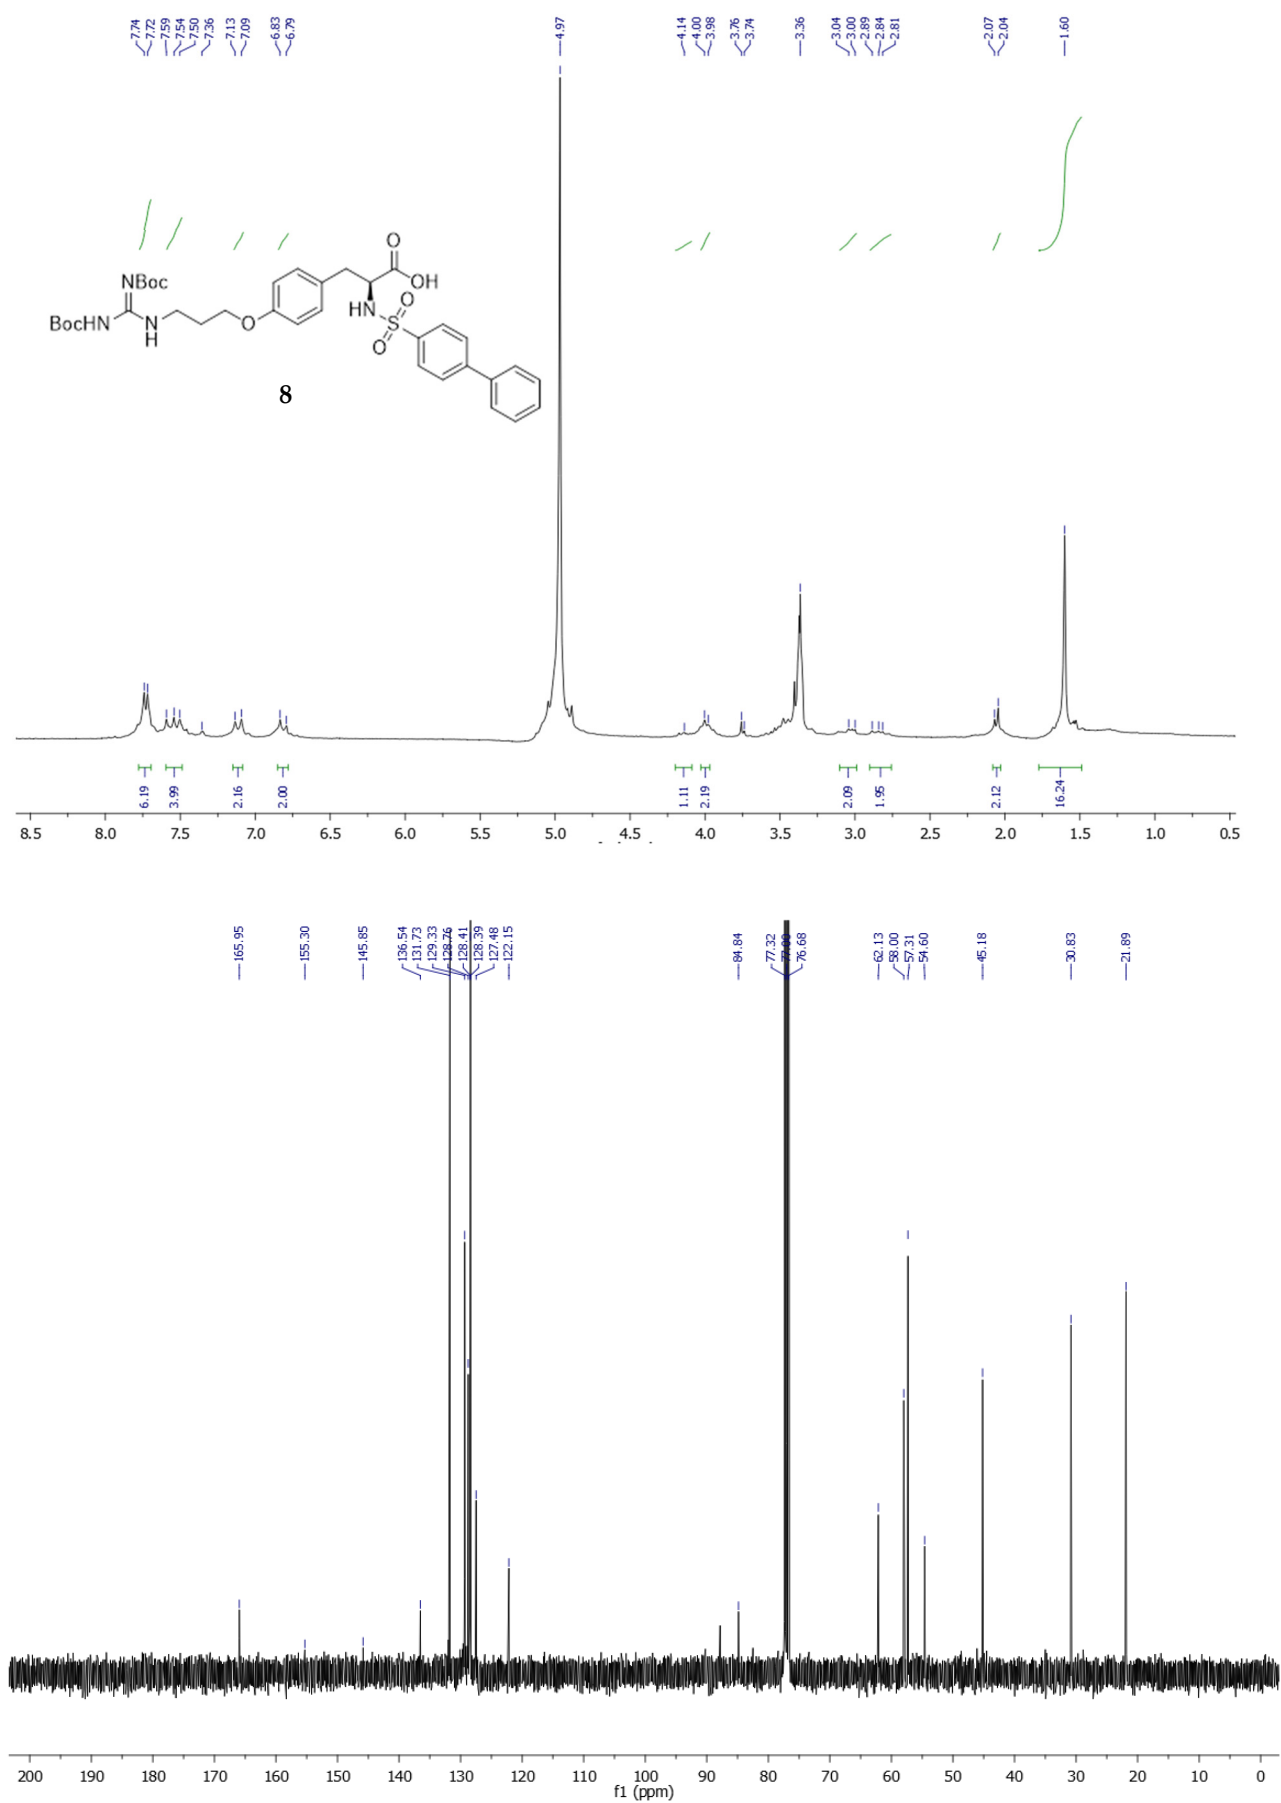

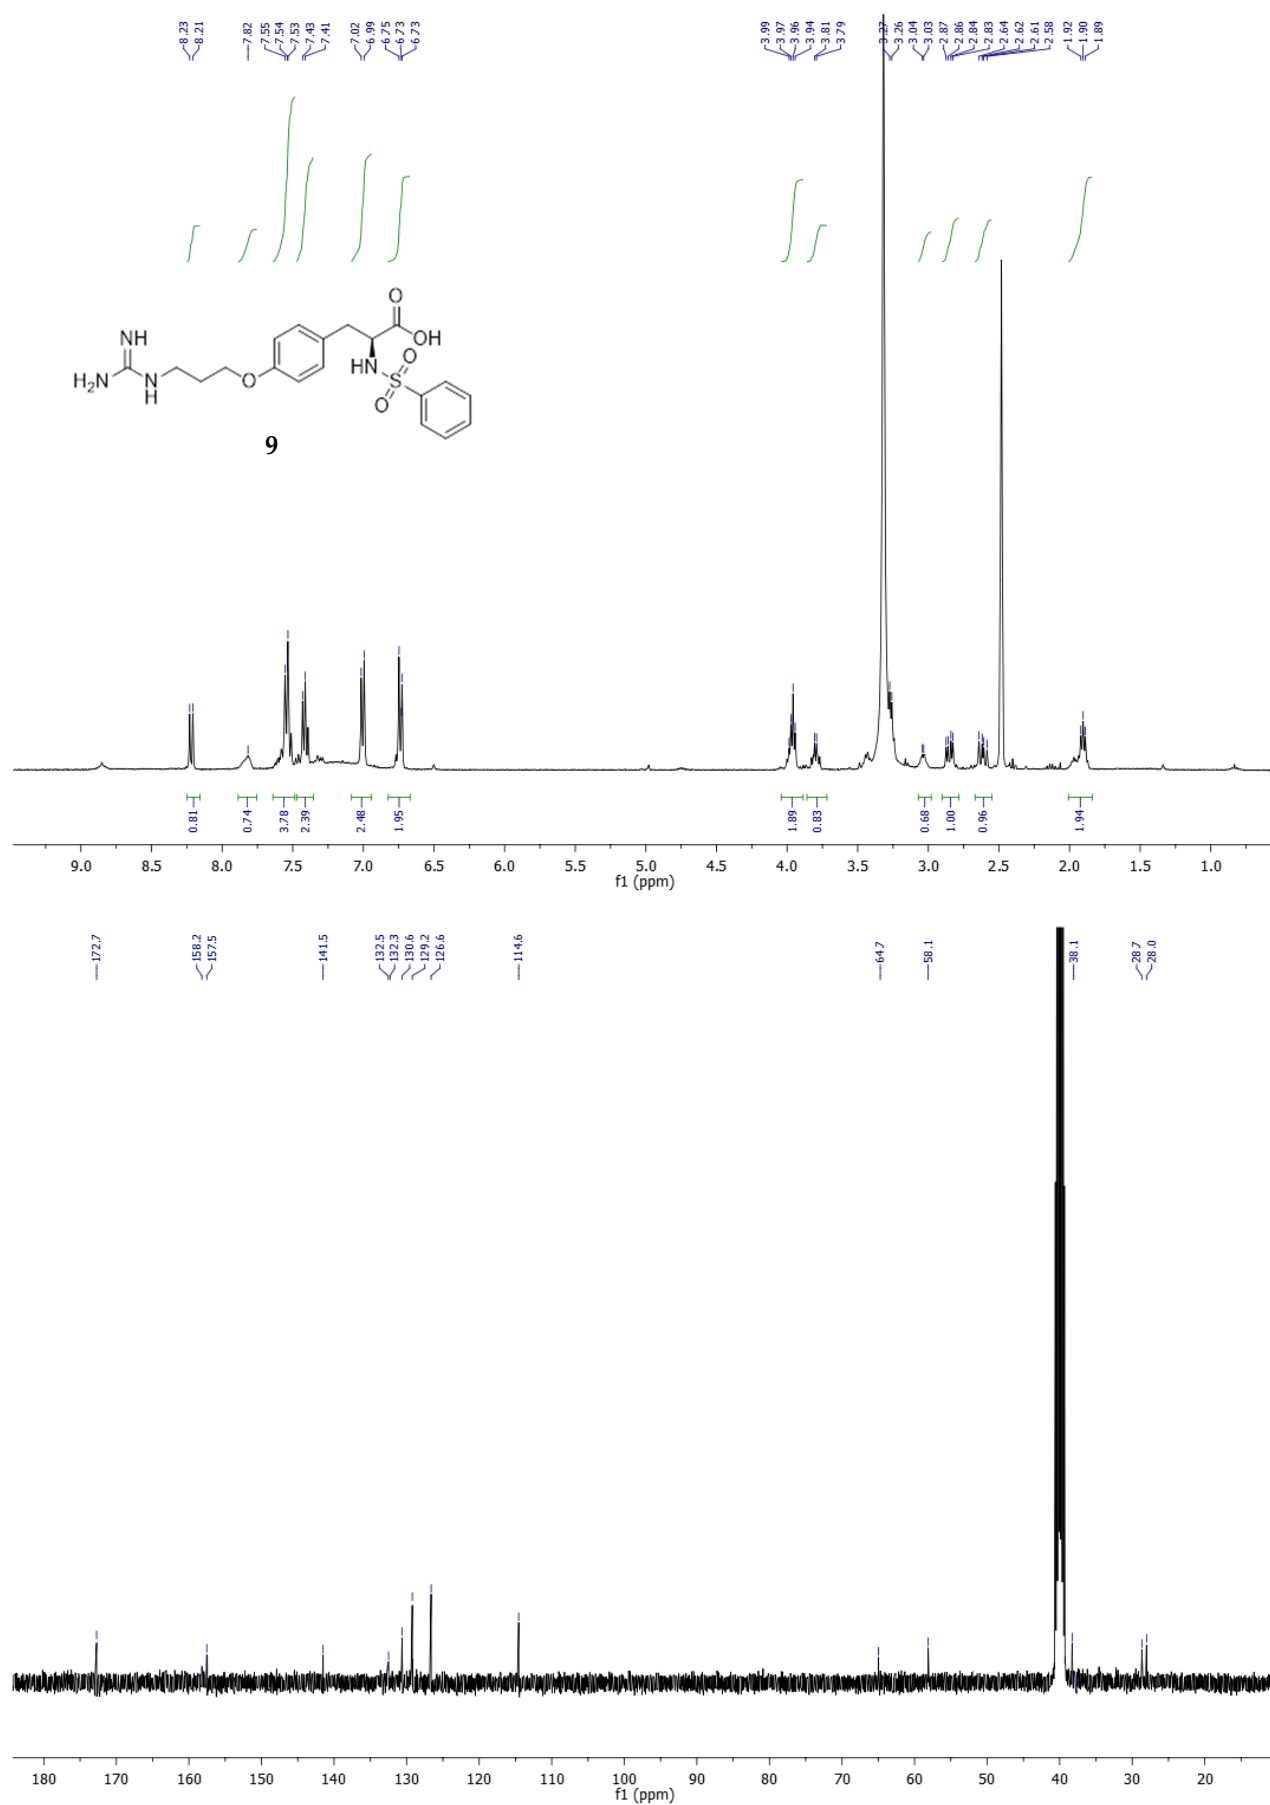



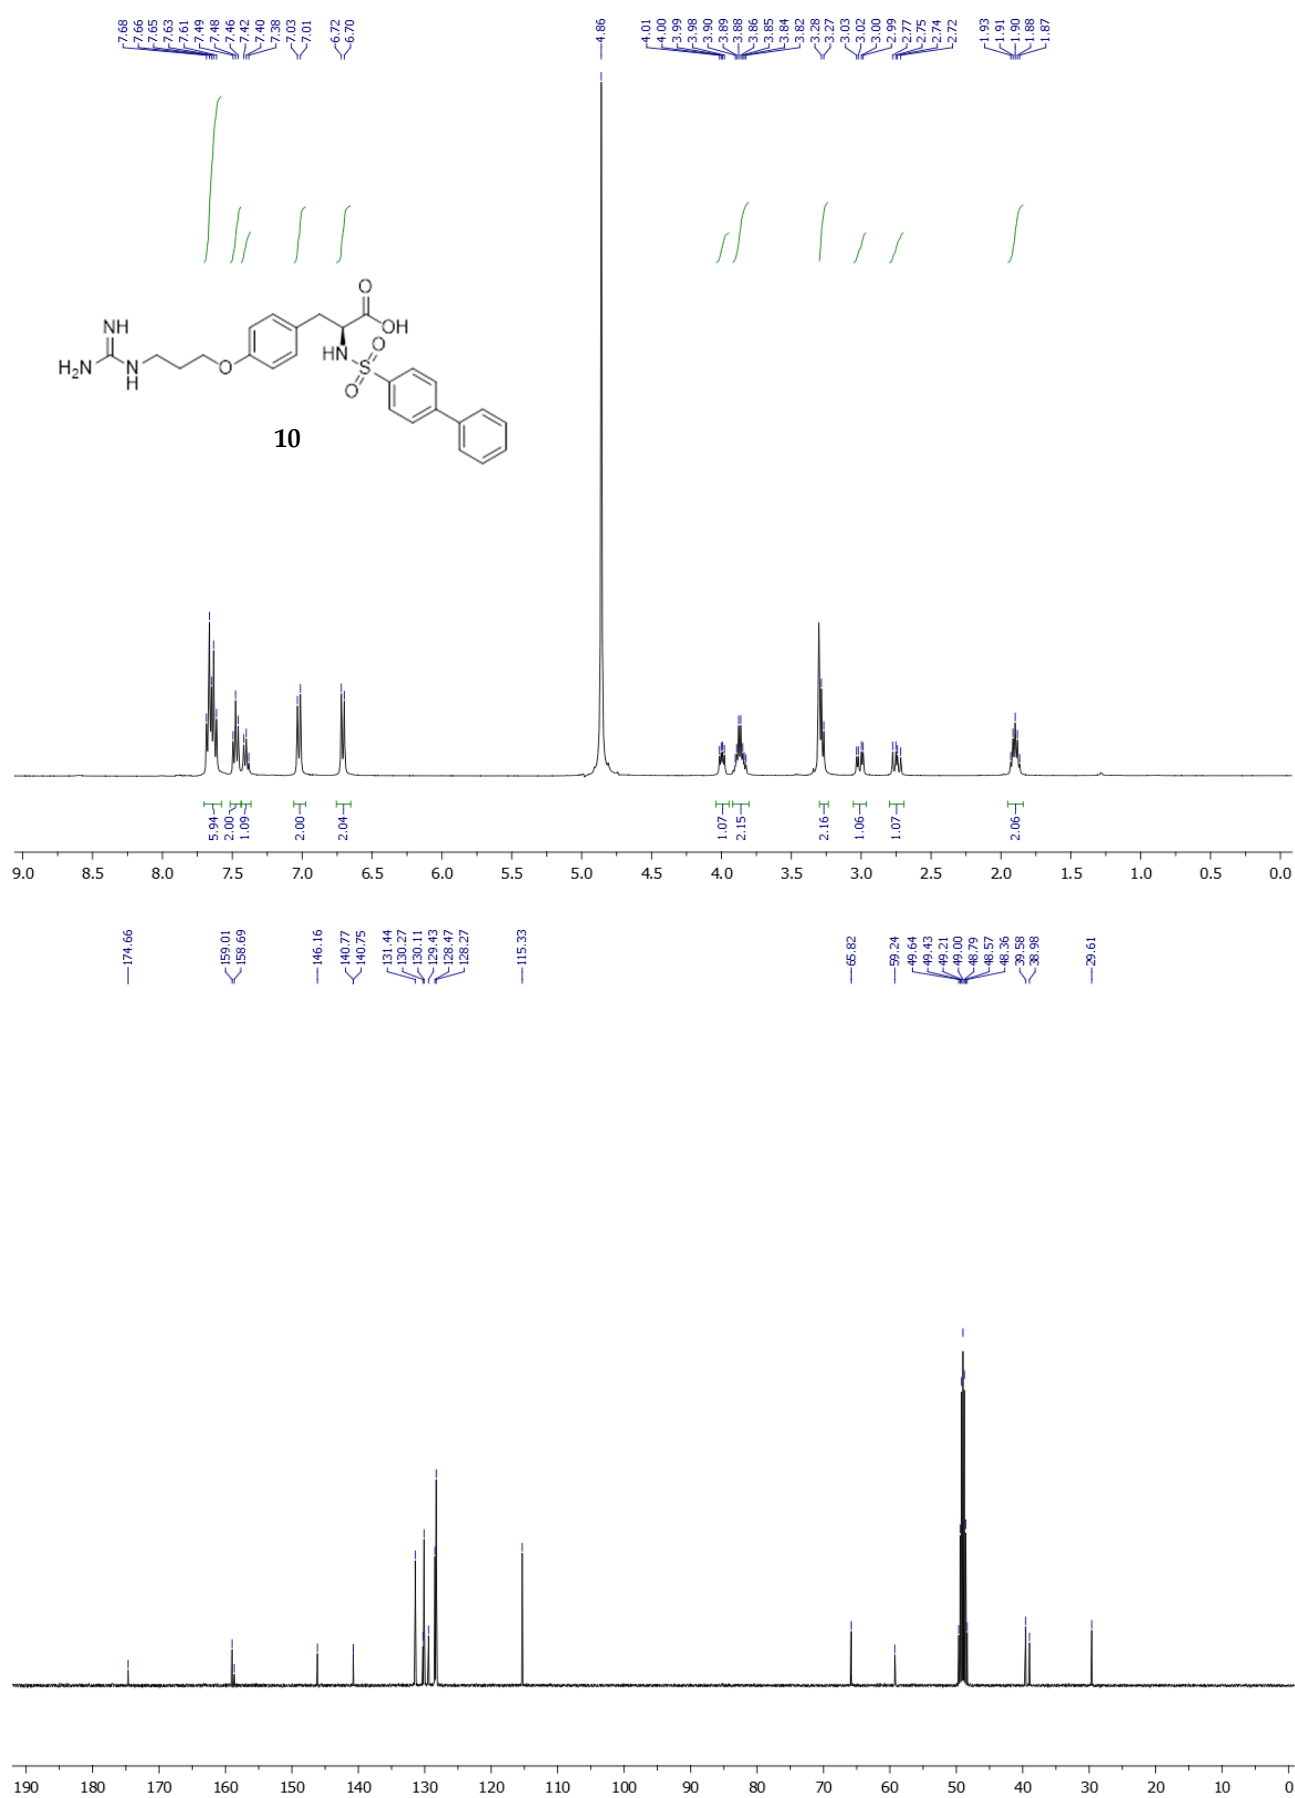

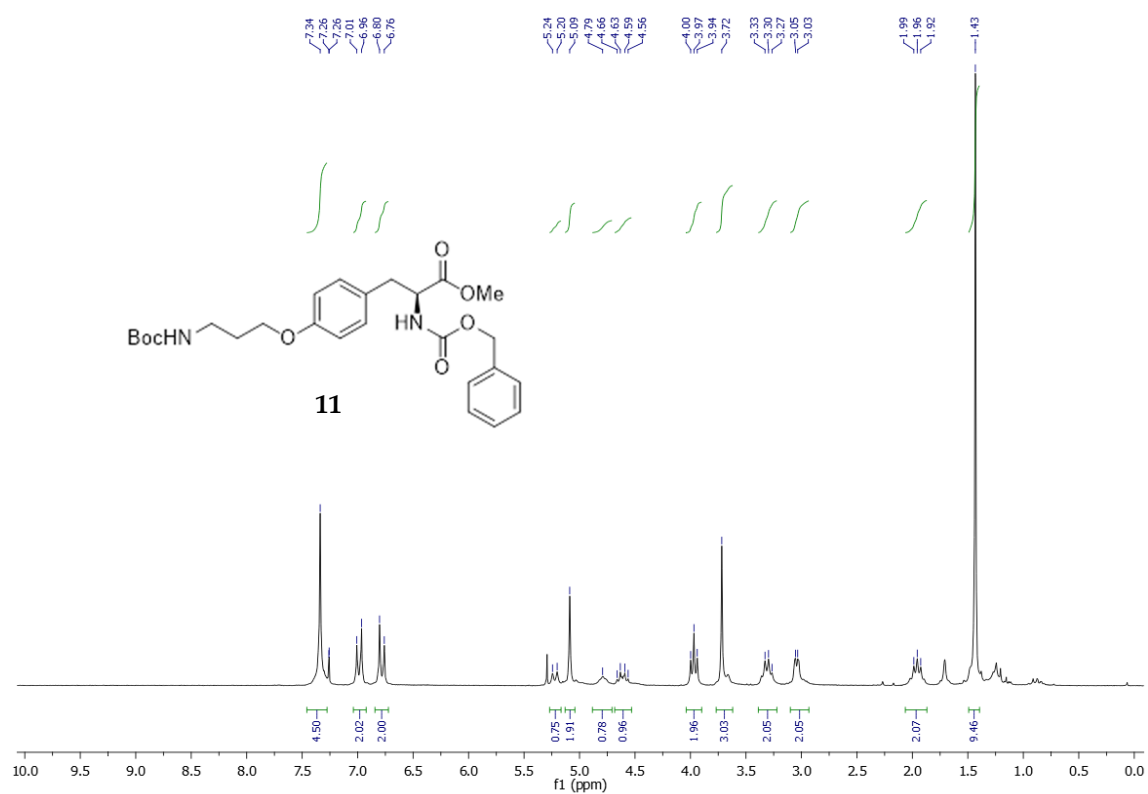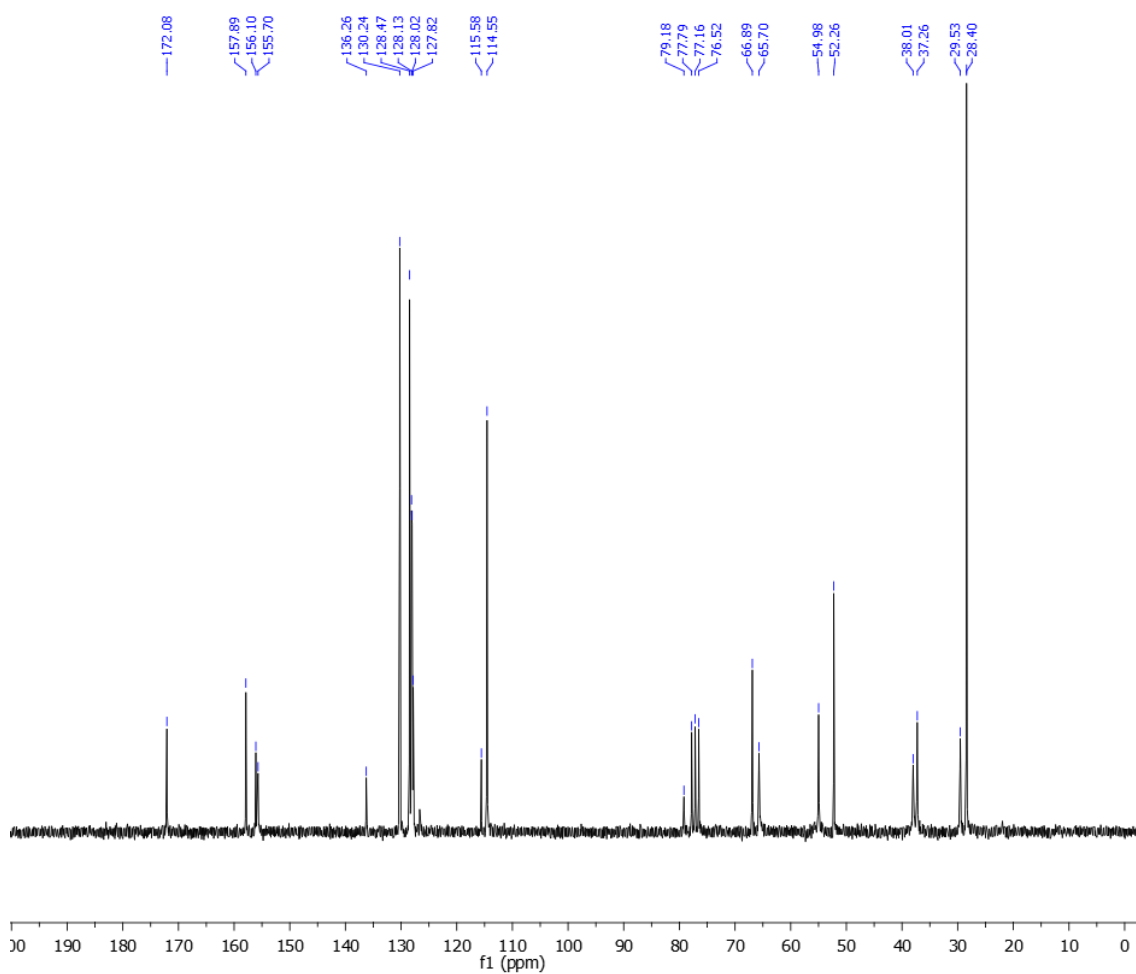

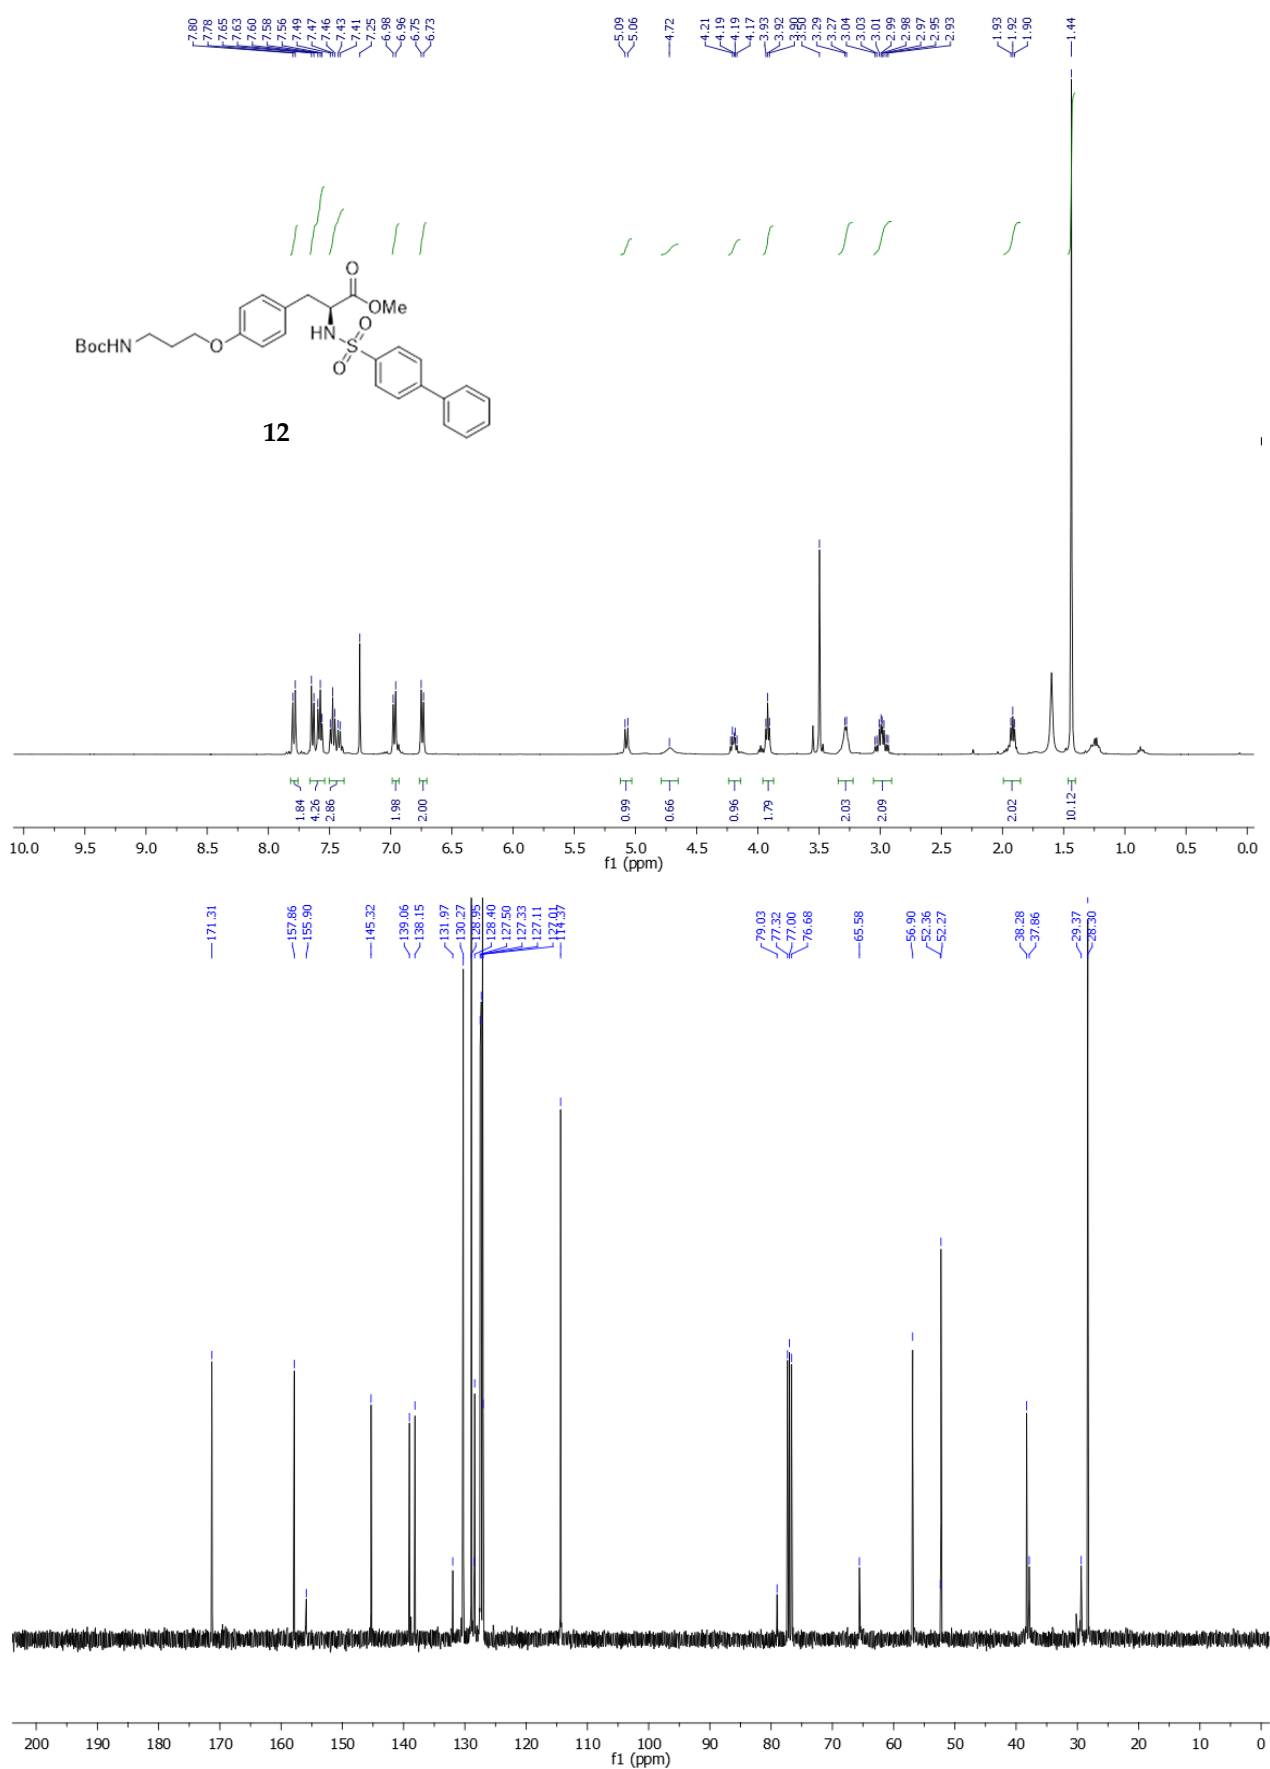

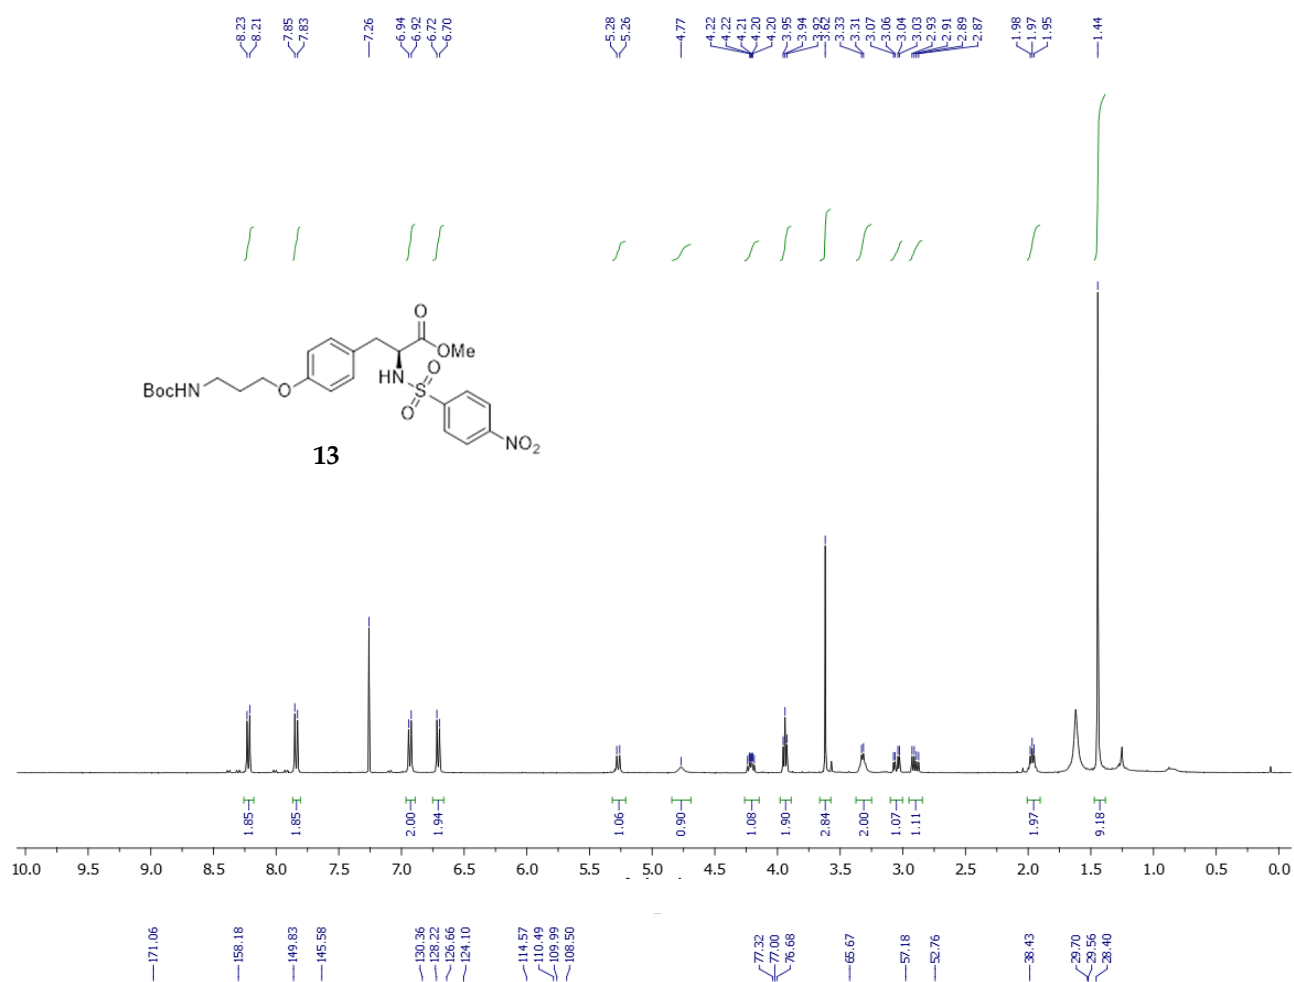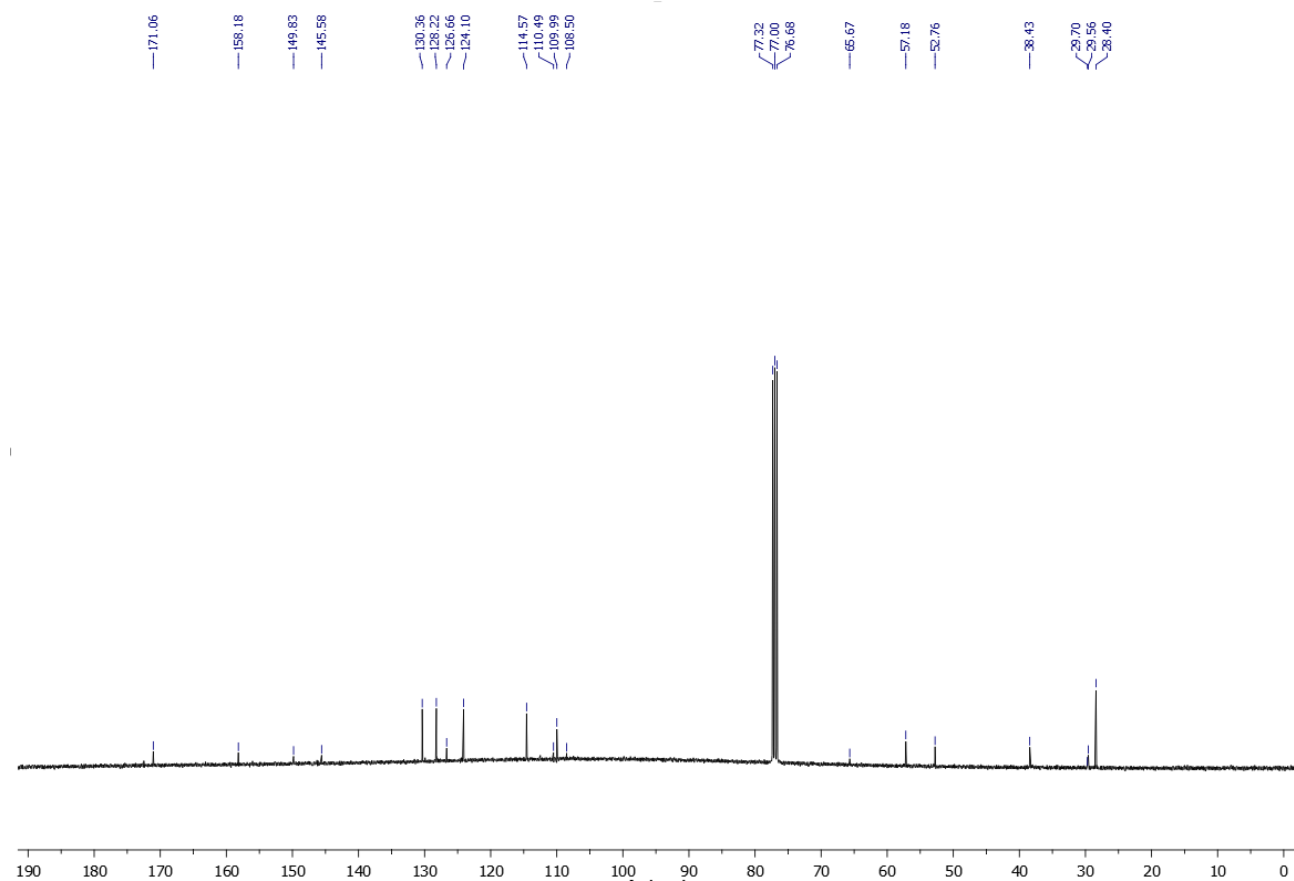

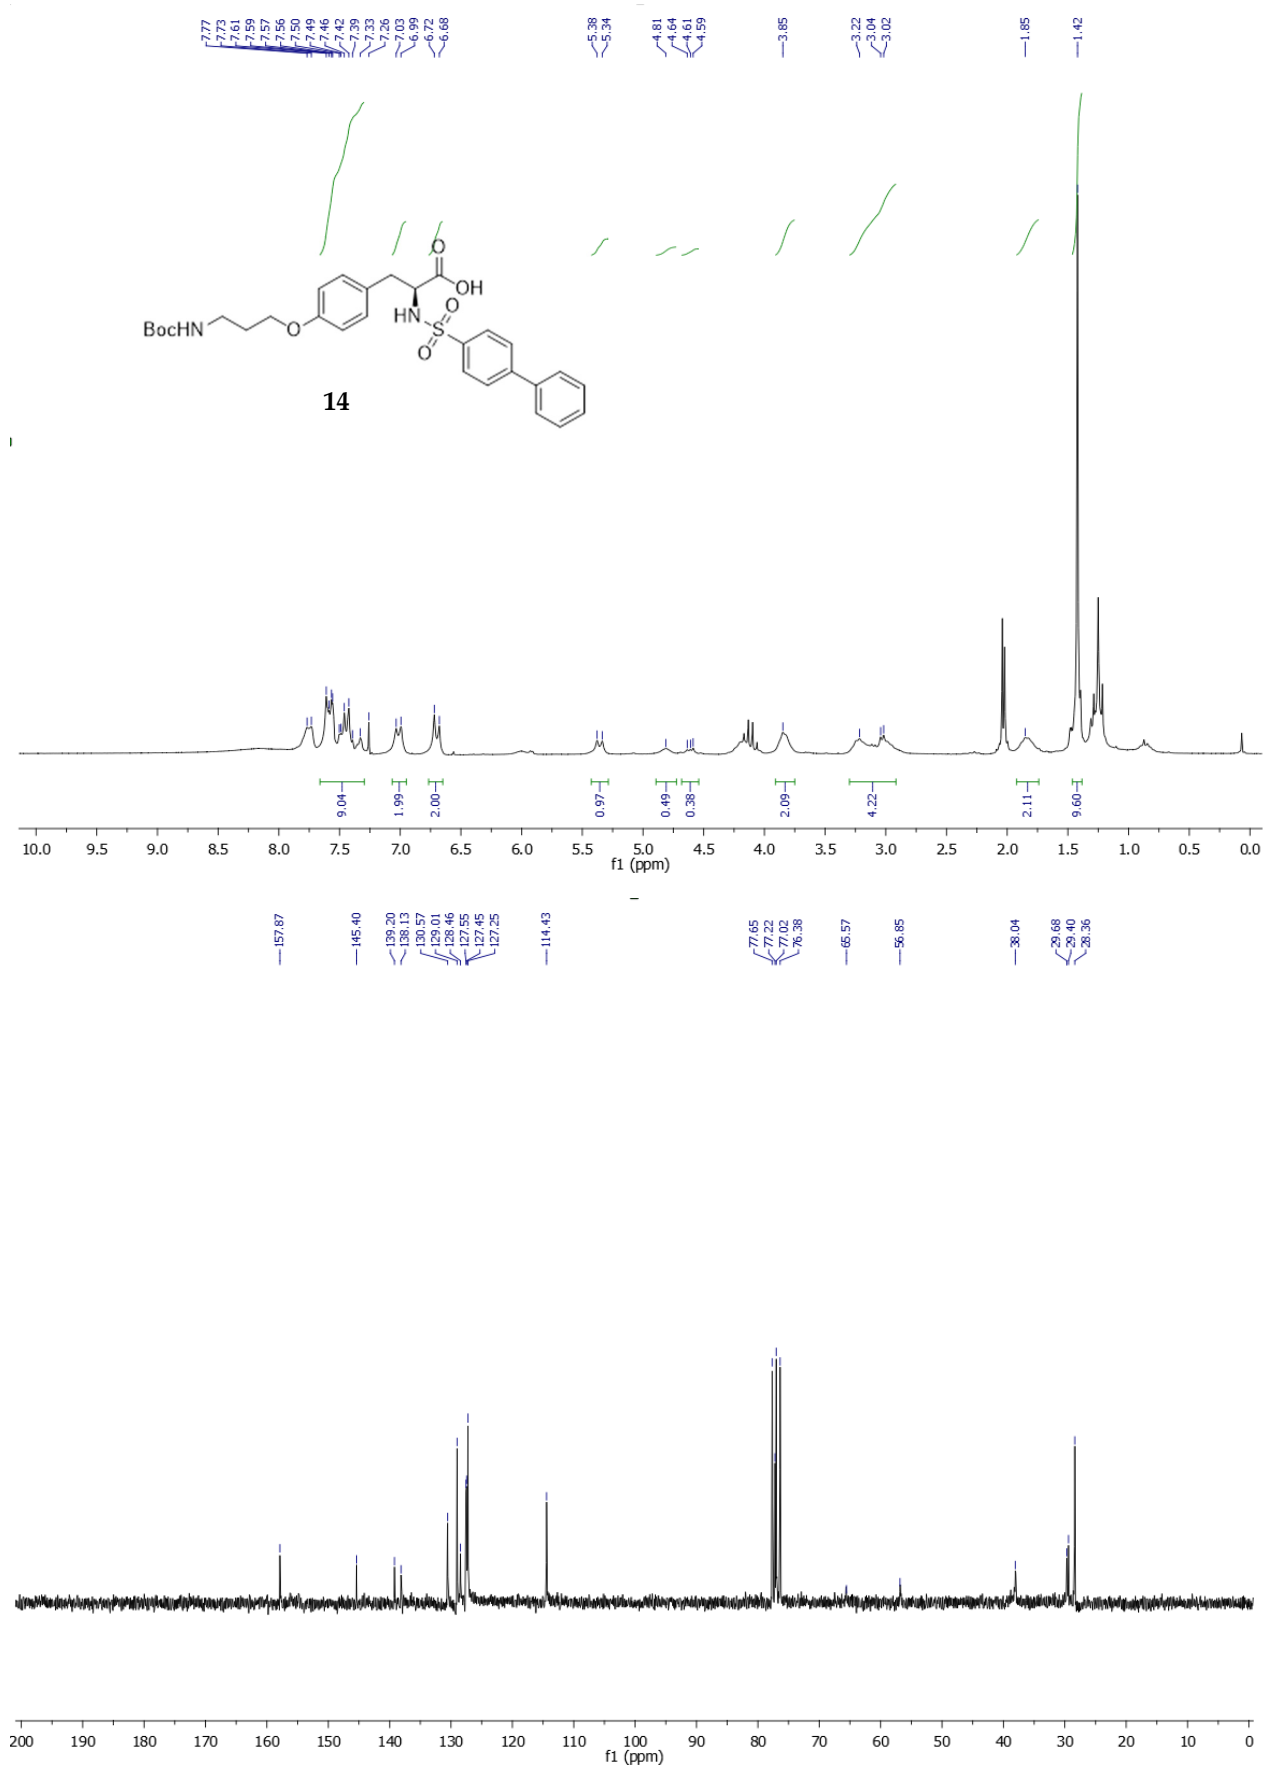

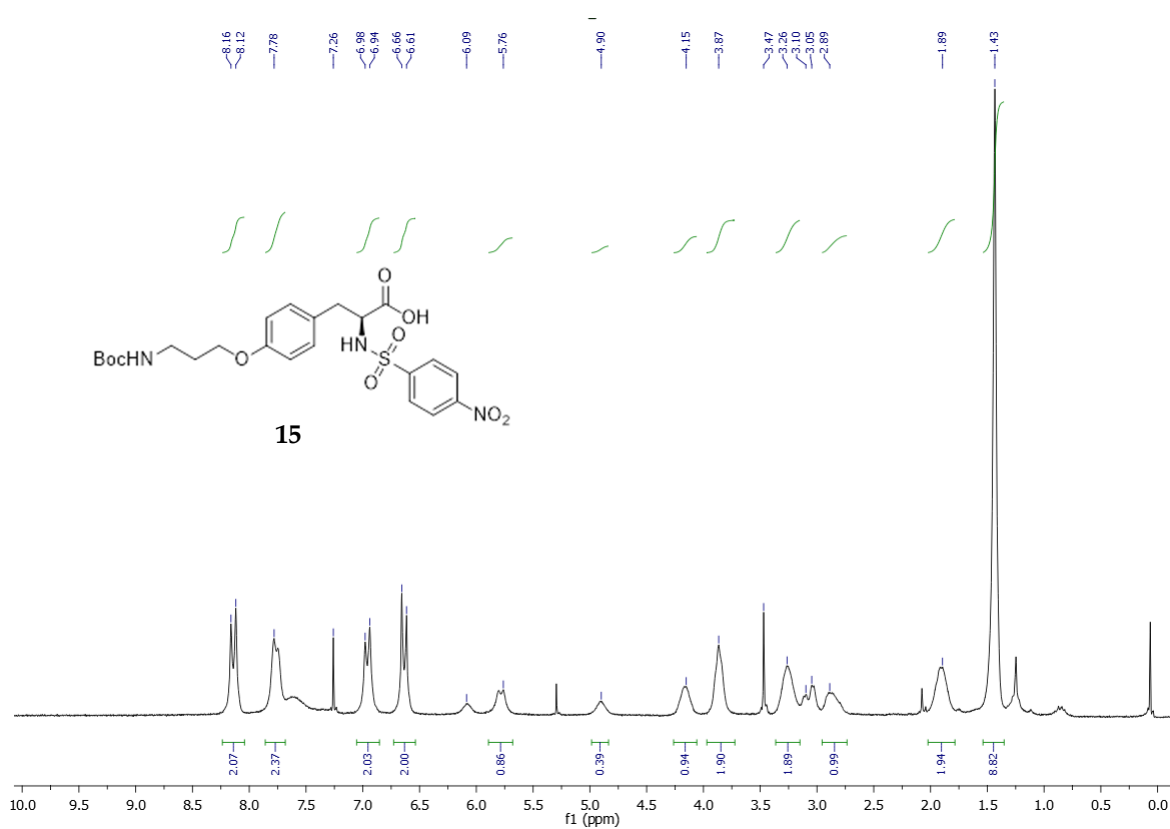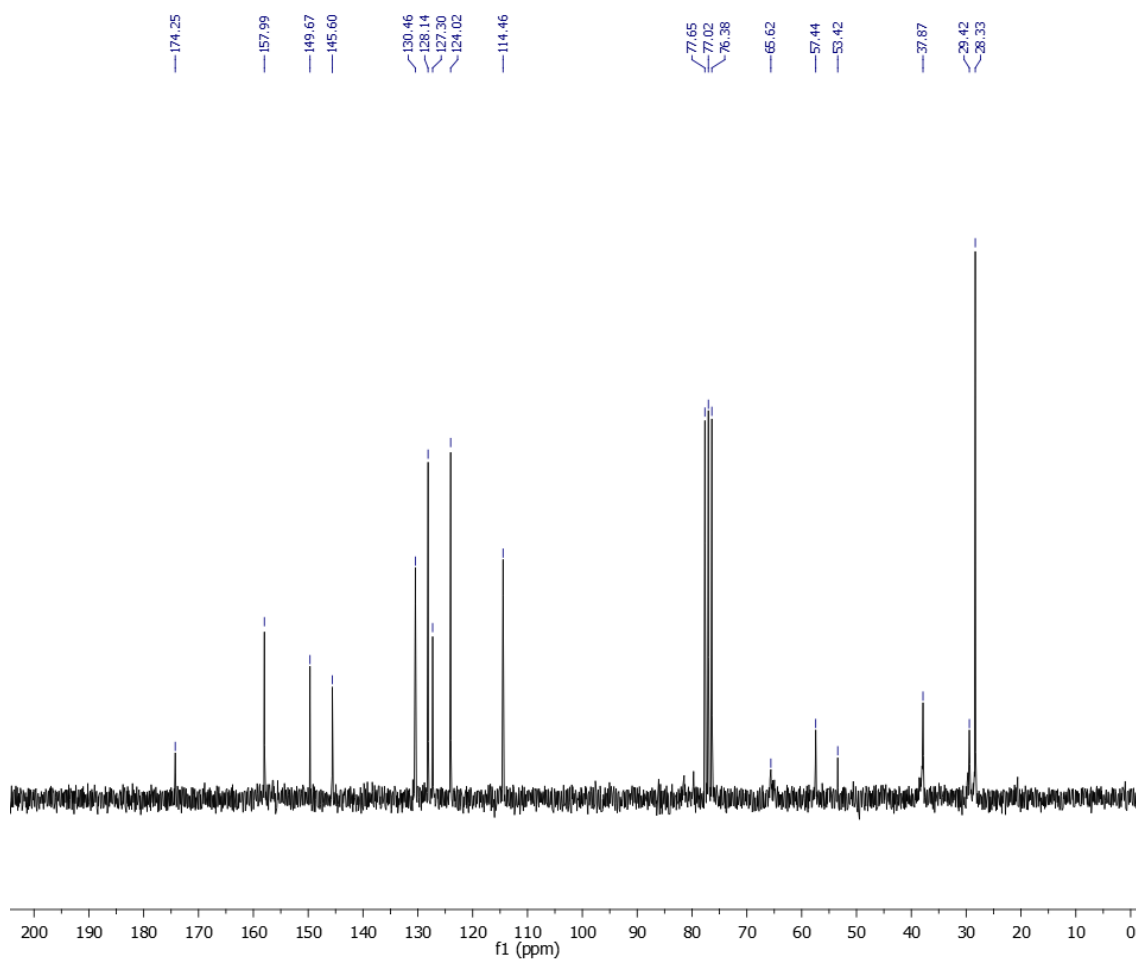

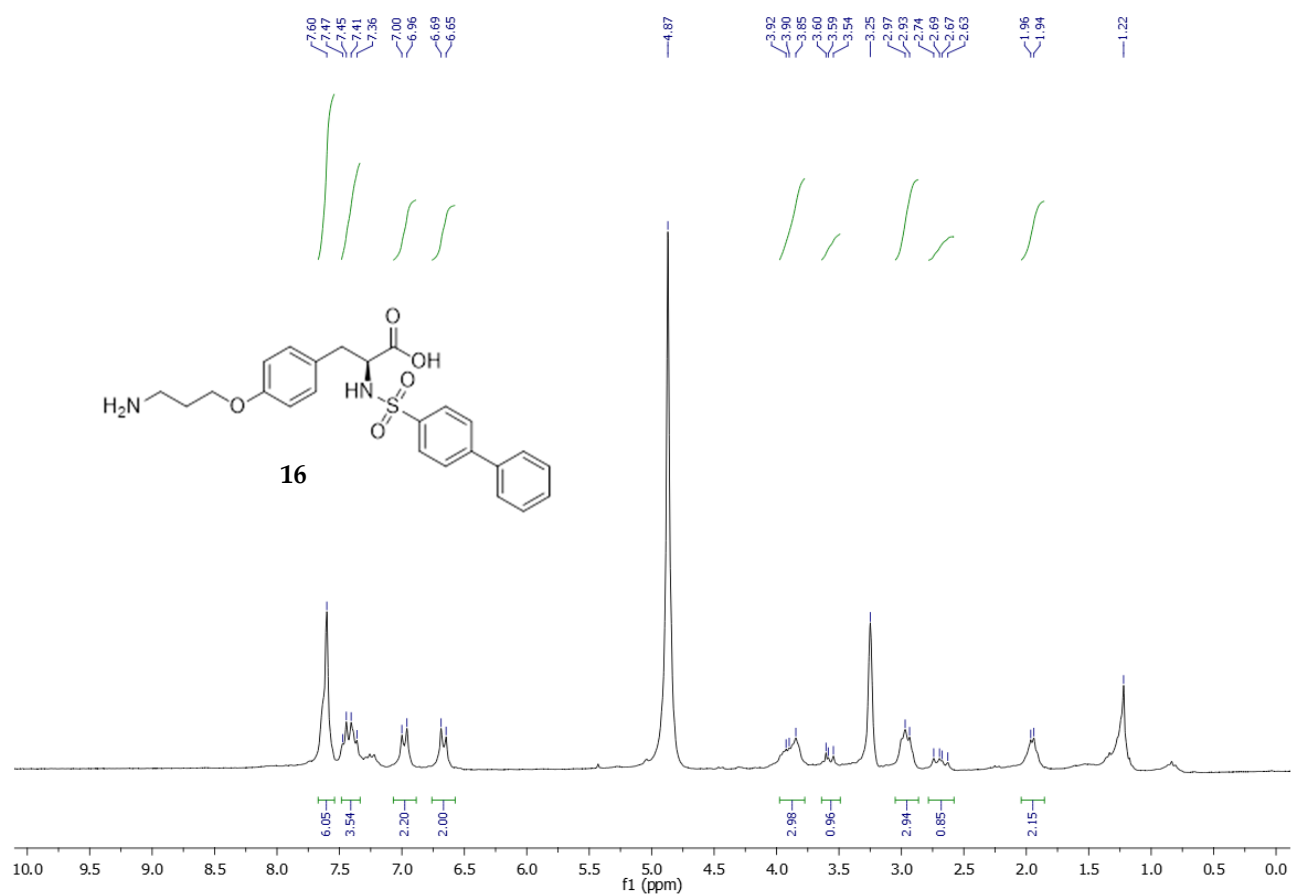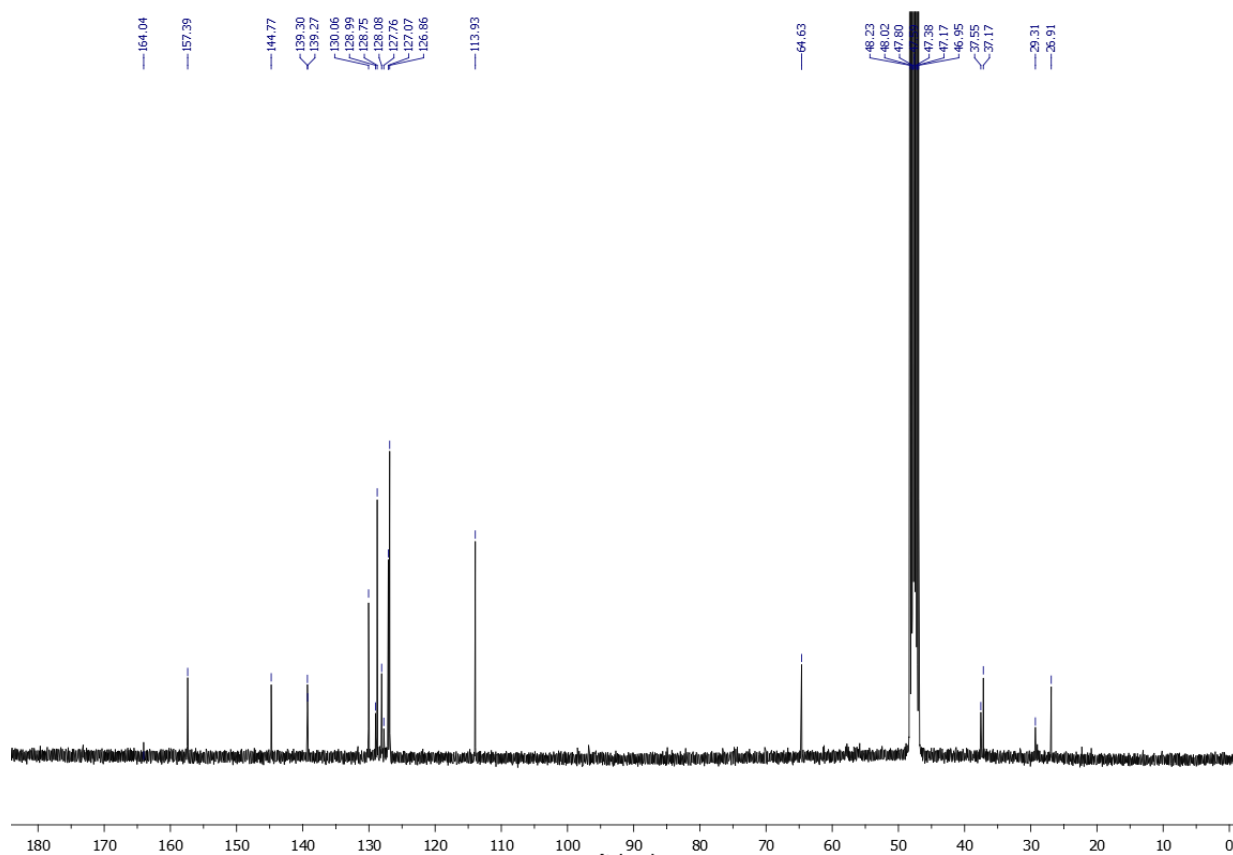

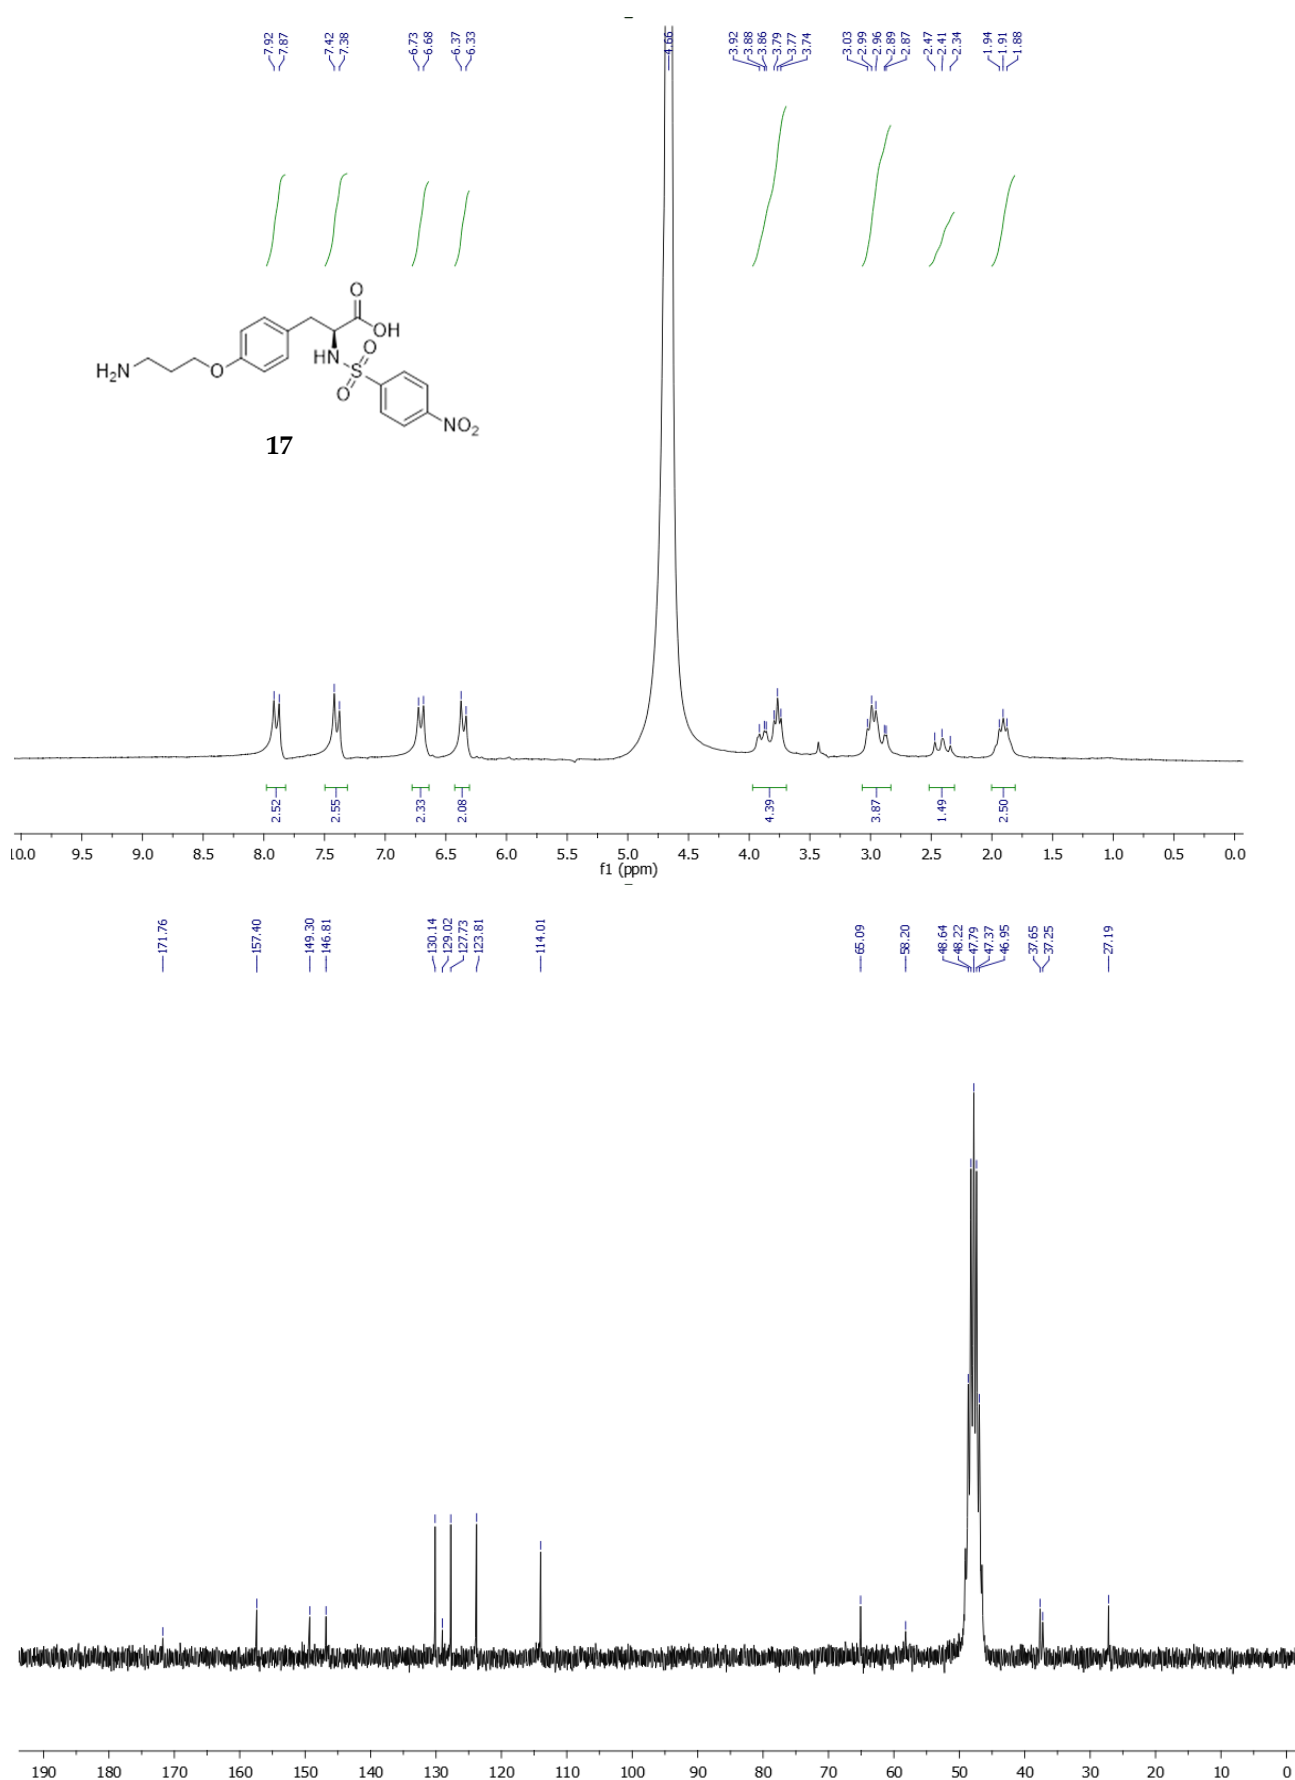



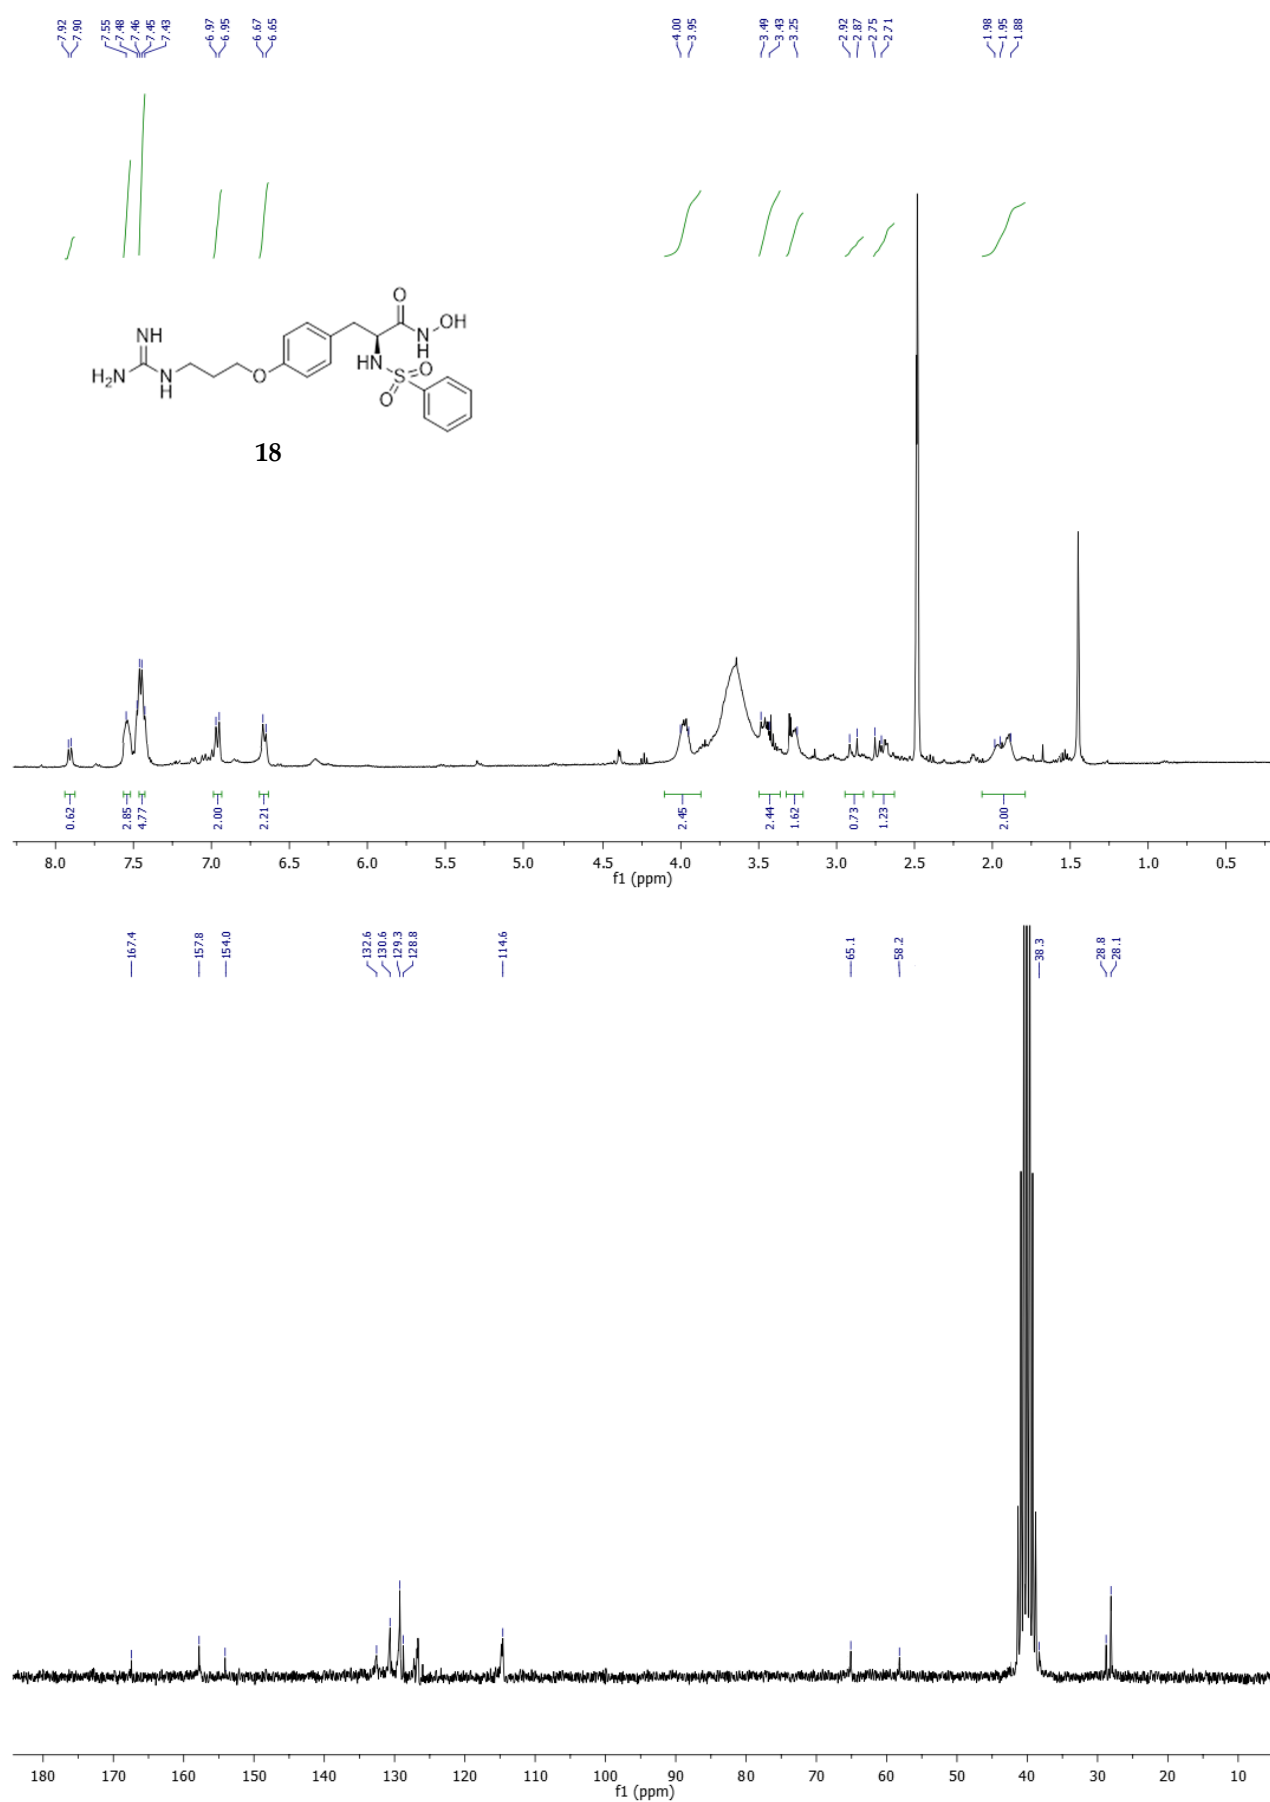

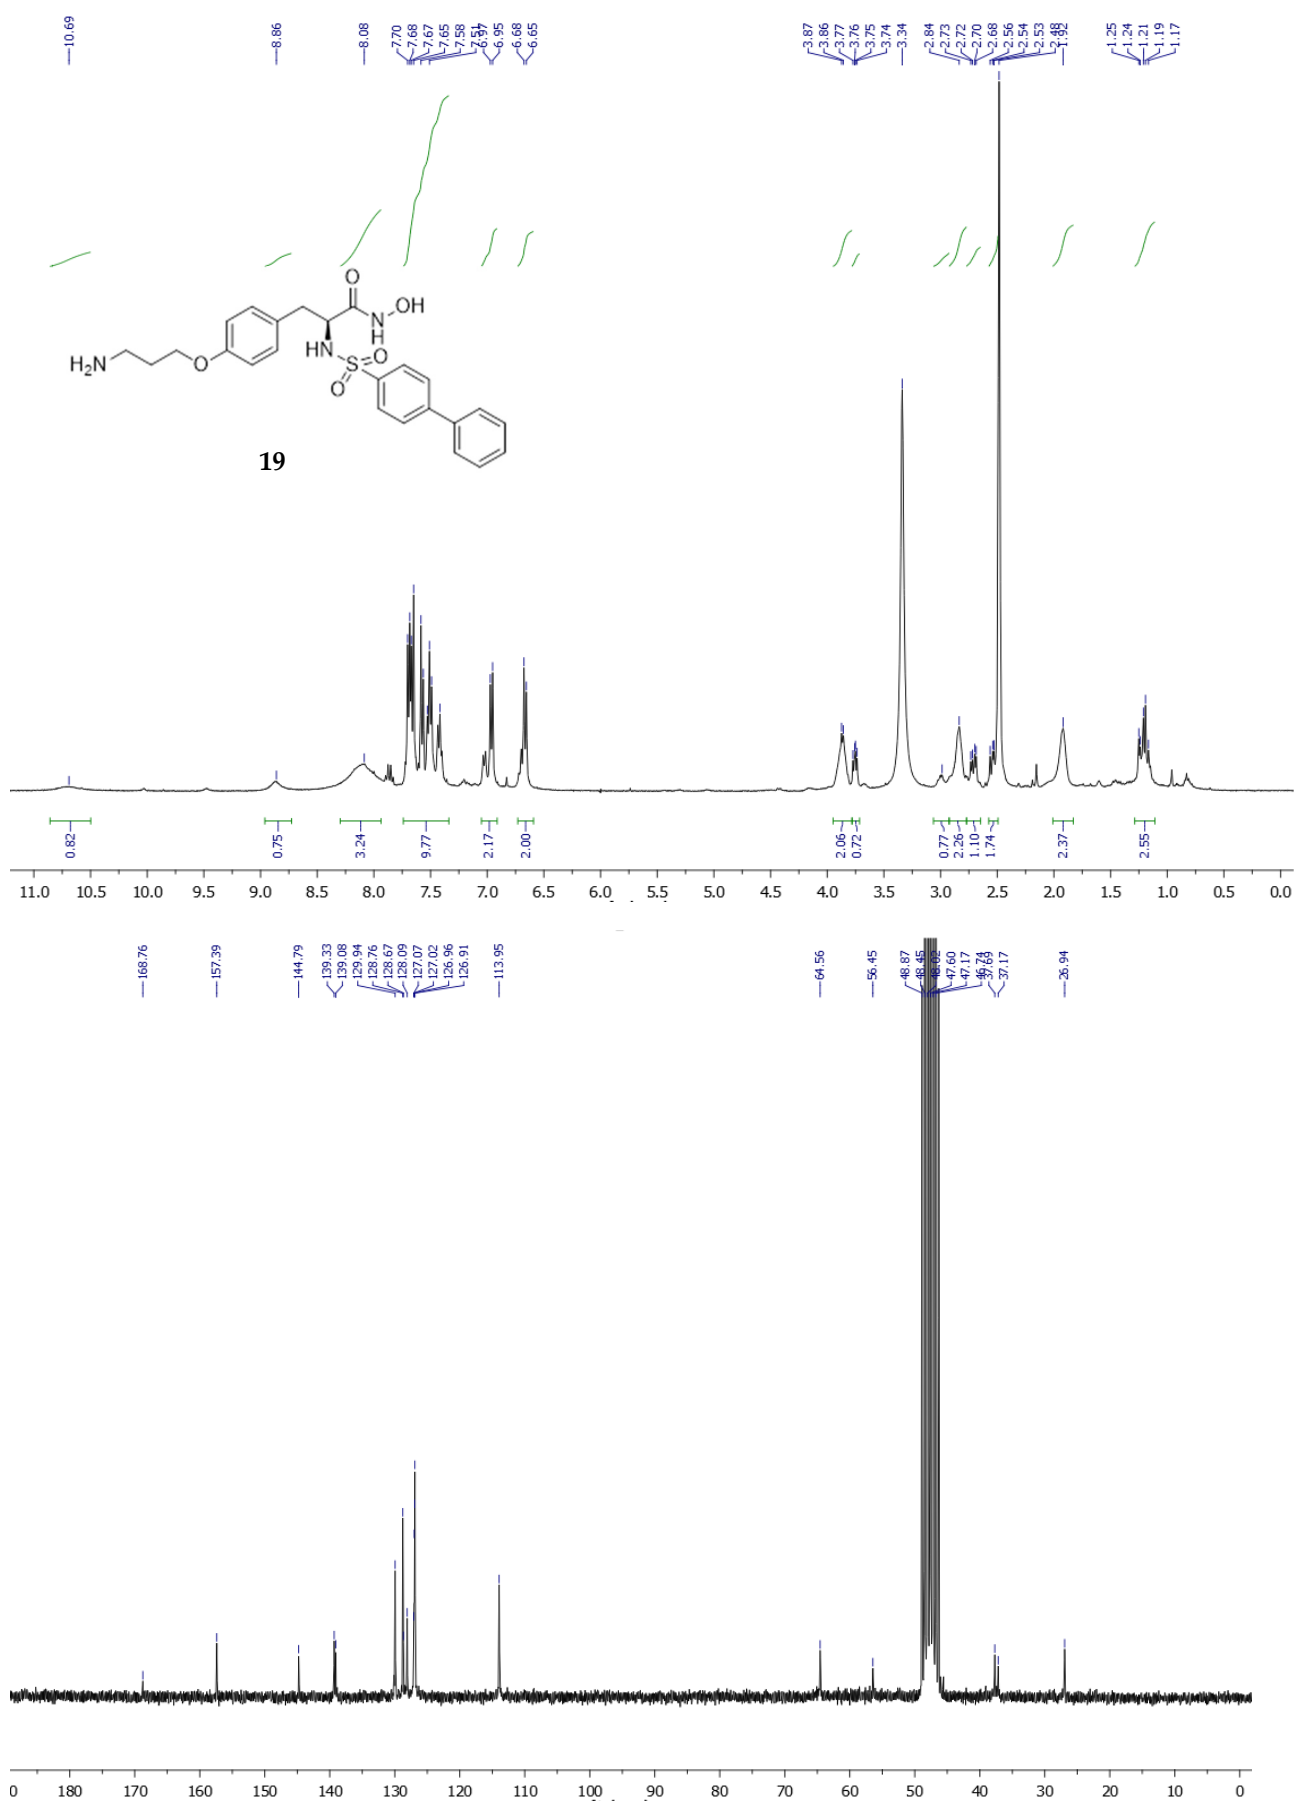

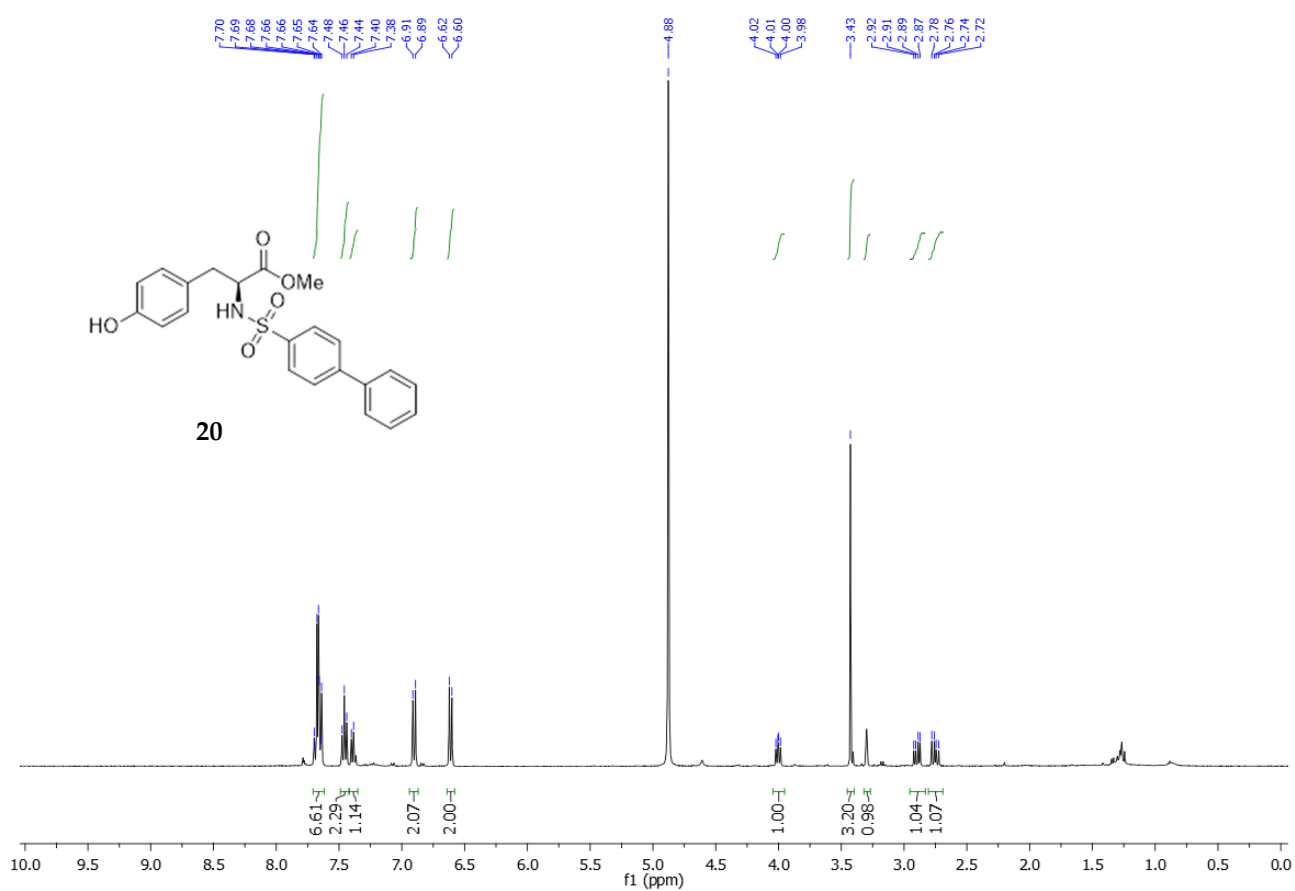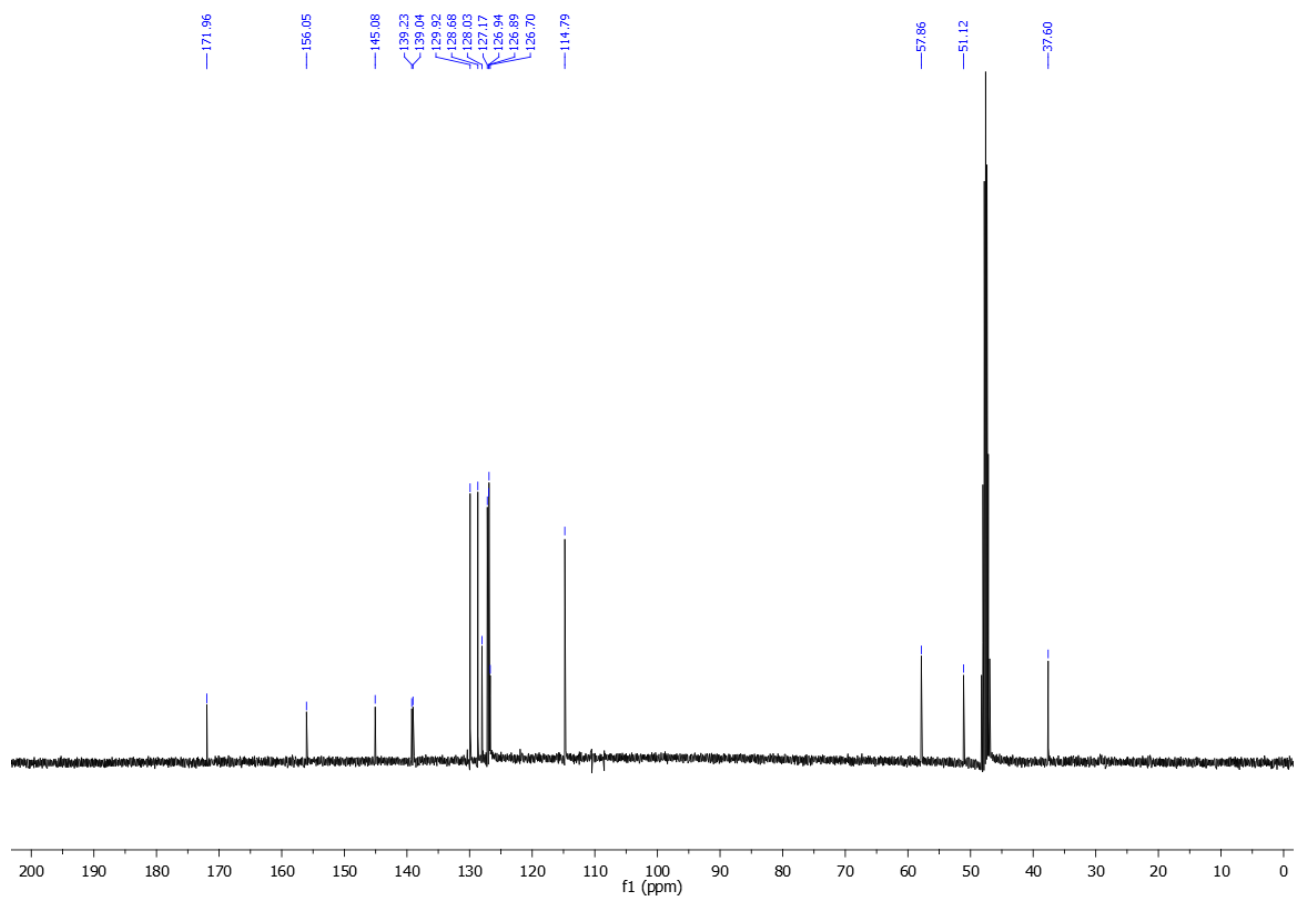

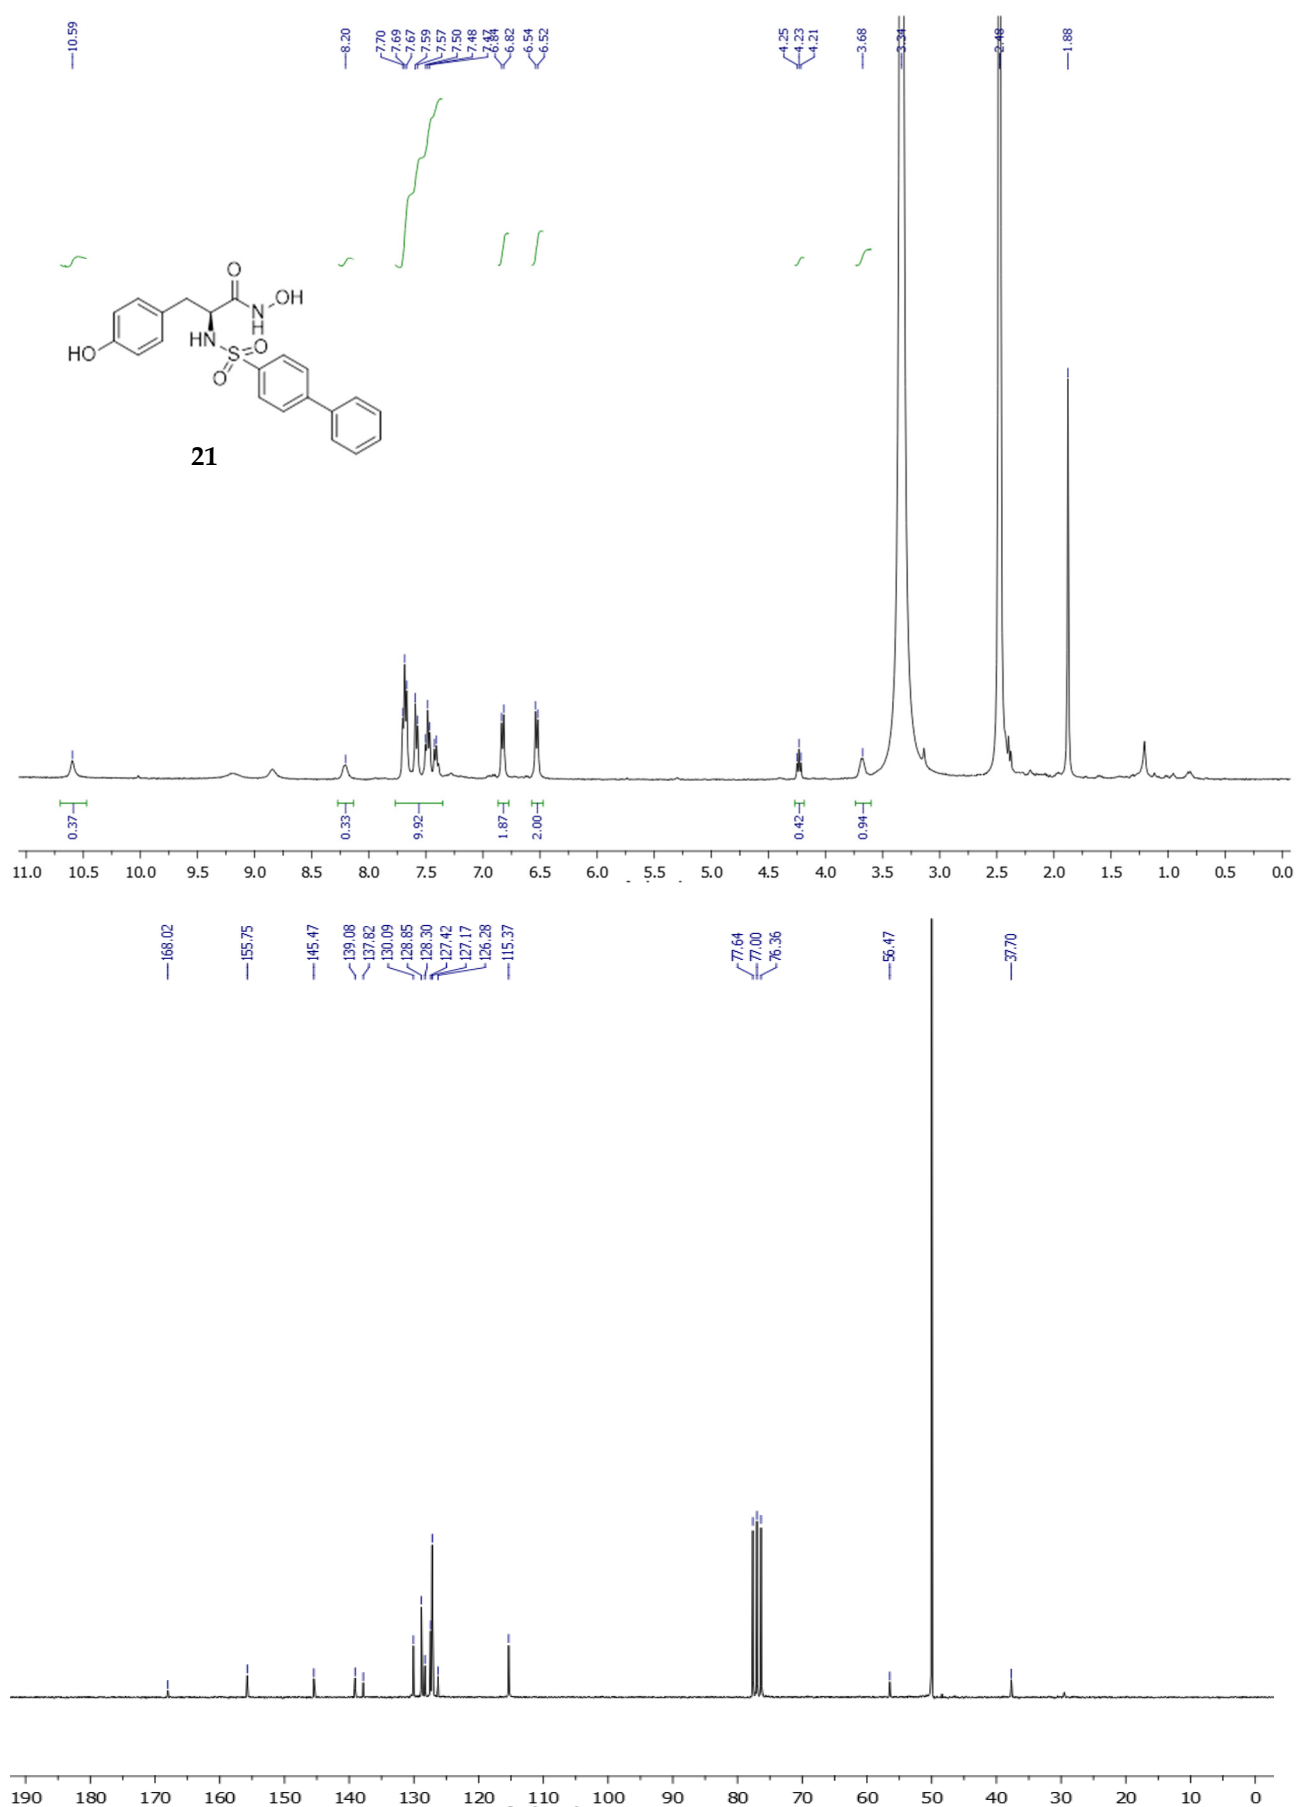

Supplement: s1 [file s1]
